# Supplementary material for: Risk prediction models for graft failure in kidney transplantation: a systematic review
Source: Oxford University Press journal article supplement (doi:10.1093/ndt/gfw405), 2016-10-26
Supplement: gfw405_Supp.pdf [file gfw405_Supp.pdf]

## Appendix 1: Queries

### 1. For Scopus research

```
( TITLE-ABS ( transplant ) OR TITLE-ABS ( transplantation ) OR TITLE-ABS ( graft ) OR TITLE-ABS ( grafting ) )
AND
( TITLE-ABS ( kidney ) OR TITLE-ABS ( renal ) )
AND
( TITLE-ABS ( prediction ) OR TITLE-ABS ( predict ) OR TITLE-ABS ( predictive ) OR TITLE-ABS ( probability ) OR
TITLE-ABS ( prognosis ) OR TITLE-ABS ( prognostic ) OR TITLE-ABS ( prognostication ) OR TITLE-ABS ( score ) OR
TITLE-ABS ( scores ) )
AND
( TITLE-ABS ( model ) OR TITLE-ABS ( models ) OR TITLE-ABS ( regression ) OR TITLE-ABS ( equation ) OR TITLE-ABS
( equations ) OR TITLE-ABS ( modeling ) OR TITLE-ABS ( modelling ) OR TITLE-ABS ( score ) OR TITLE-ABS ( scores )
OR TITLE-ABS ( probability ) OR TITLE-ABS ( prognosis ) OR TITLE-ABS ( prognostic ) OR TITLE-ABS (
prognostication ) )
AND
( TITLE-ABS ( failure ) OR TITLE-ABS ( loss ) OR TITLE-ABS ( death ) OR TITLE-ABS ( mortality ) OR TITLE-ABS (
survival ) )
AND
( TITLE-ABS-KEY( prediction ) OR TITLE-ABS-KEY( predict ) OR TITLE-ABS-KEY( predictive ) OR TITLE-ABS-KEY (
predicting ) OR TITLE-ABS-KEY ( validation ) OR TITLE-ABS-KEY ( validity ) OR TITLE-ABS-KEY ( validated ) OR TITLE-
ABS-KEY ( cross-validation ) OR TITLE-ABS-KEY ( selection ) OR TITLE-ABS-KEY ( calibration ) OR TITLE-ABS-KEY (
discrimination ) OR TITLE-ABS-KEY( discriminates ) OR TITLE-ABS-KEY ( ROC ) )
```

### 2. For PubMed research

```
("transplant" [Title/Abstract] OR "transplantation" [Title/Abstract] OR "graft" [Title/Abstract] OR "grafting"
[Title/Abstract])
AND
("kidney" [Title/Abstract] OR "renal" [Title/Abstract])
AND
( " prediction" [Title/Abstract] OR " predict" [Title/Abstract] OR " predictive" [Title/Abstract] OR "probability"
[Title/Abstract] OR " prognosis" [Title/Abstract] OR "prognostic" [Title/Abstract] OR "prognostication"
[Title/Abstract] OR " score " [Title/Abstract] OR " scores" [Title/Abstract] )
AND
( "model" [Title/Abstract] OR "models" [Title/Abstract] OR "regression" [Title/Abstract] OR "equation"
[Title/Abstract] OR "equations" [Title/Abstract] OR "modeling" [Title/Abstract] OR "modelling" [Title/Abstract]
OR "score" [Title/Abstract] OR "scores" [Title/Abstract] OR "probability" [Title/Abstract] OR "prognosis"
[Title/Abstract] OR " prognostic" [Title/Abstract] OR "prognostication" [Title/Abstract] )
AND
( " failure" [Title/Abstract] OR " loss" [Title/Abstract] OR " death" [Title/Abstract] OR " mortality"
[Title/Abstract] OR " survival" [Title/Abstract] )
AND
( "prediction" [Title/Abstract] OR " predict " [Title/Abstract] OR "predictive" [Title/Abstract] OR " predicting "
[Title/Abstract] OR " validation" [Title/Abstract] OR " validity" [Title/Abstract] OR " validated " [Title/Abstract]
OR " cross-validation " [Title/Abstract] OR " selection " [Title/Abstract] OR " calibration" [Title/Abstract] OR "
discrimination" [Title/Abstract] OR " discriminates" [Title/Abstract] OR " ROC " [Title/Abstract] )
```

| Appendix 2 : Data extraction table                                            |                                          |                                                              |                                                              |                                                   |                                                                                                                                                                                                                                                                                                                                                                                                          |                                                                                                                                                                                                                                                                                                                             |                                                                                                           |                                                     |                                                                                          |                                                                                                                                                                                                                                                                                                                                                                                                                                                                                                                                                                                                                                                                                                                                                                                                                                                                                                                                                                                                                                                                                                                                                                                                                                                                                                                                                                                 |                                                                                                                                                                                                                                                |  |
|-------------------------------------------------------------------------------|------------------------------------------|--------------------------------------------------------------|--------------------------------------------------------------|---------------------------------------------------|----------------------------------------------------------------------------------------------------------------------------------------------------------------------------------------------------------------------------------------------------------------------------------------------------------------------------------------------------------------------------------------------------------|-----------------------------------------------------------------------------------------------------------------------------------------------------------------------------------------------------------------------------------------------------------------------------------------------------------------------------|-----------------------------------------------------------------------------------------------------------|-----------------------------------------------------|------------------------------------------------------------------------------------------|---------------------------------------------------------------------------------------------------------------------------------------------------------------------------------------------------------------------------------------------------------------------------------------------------------------------------------------------------------------------------------------------------------------------------------------------------------------------------------------------------------------------------------------------------------------------------------------------------------------------------------------------------------------------------------------------------------------------------------------------------------------------------------------------------------------------------------------------------------------------------------------------------------------------------------------------------------------------------------------------------------------------------------------------------------------------------------------------------------------------------------------------------------------------------------------------------------------------------------------------------------------------------------------------------------------------------------------------------------------------------------|------------------------------------------------------------------------------------------------------------------------------------------------------------------------------------------------------------------------------------------------|--|
| Author and years (journal)                                                    |                                          | Akl et al. 2008 (24)<br>(Transplantation)                    |                                                              | Bang et al. 2010 (60)<br>(Yonei Medicine Journal) |                                                                                                                                                                                                                                                                                                                                                                                                          | Baskin-Bey et al. 2007 (25)<br>(American Journal of Kidney Diseases)                                                                                                                                                                                                                                                        |                                                                                                           | Bodonyi-Kovacs et al. 2010 (26)<br>(Human Immunoly) |                                                                                          | Brown et al 2012 (57)<br>(American Journal of Nephrology)                                                                                                                                                                                                                                                                                                                                                                                                                                                                                                                                                                                                                                                                                                                                                                                                                                                                                                                                                                                                                                                                                                                                                                                                                                                                                                                       |                                                                                                                                                                                                                                                |  |
| Type of study                                                                 |                                          | Development and validation of a new model                    |                                                              | Validating with model updating                    |                                                                                                                                                                                                                                                                                                                                                                                                          | Development and validation of a new model                                                                                                                                                                                                                                                                                   |                                                                                                           | Development and validation of a new model           |                                                                                          | Development and validation of a new model                                                                                                                                                                                                                                                                                                                                                                                                                                                                                                                                                                                                                                                                                                                                                                                                                                                                                                                                                                                                                                                                                                                                                                                                                                                                                                                                       |                                                                                                                                                                                                                                                |  |
| Donor type                                                                    |                                          | Living donors                                                |                                                              | Deceased donors                                   |                                                                                                                                                                                                                                                                                                                                                                                                          | Deceased donors                                                                                                                                                                                                                                                                                                             |                                                                                                           | Living donors                                       |                                                                                          | Deceased donors                                                                                                                                                                                                                                                                                                                                                                                                                                                                                                                                                                                                                                                                                                                                                                                                                                                                                                                                                                                                                                                                                                                                                                                                                                                                                                                                                                 |                                                                                                                                                                                                                                                |  |
| Recipient age range                                                           |                                          | Adult (Age range unspecified)                                |                                                              | Adult (Age range unspecified)                     |                                                                                                                                                                                                                                                                                                                                                                                                          | Adult (Age range unspecified)                                                                                                                                                                                                                                                                                               |                                                                                                           | Unspecified                                         |                                                                                          | ≥ 18 years                                                                                                                                                                                                                                                                                                                                                                                                                                                                                                                                                                                                                                                                                                                                                                                                                                                                                                                                                                                                                                                                                                                                                                                                                                                                                                                                                                      |                                                                                                                                                                                                                                                |  |
| OUTCOMES                                                                      | Studied event                            |                                                              | Graft failure (Dialysis/re-transplantation/death)            |                                                   | Death censored graft failure defined by eGFR less than 10 mL/min/1.73 m2 or conversion to dialysis                                                                                                                                                                                                                                                                                                       |                                                                                                                                                                                                                                                                                                                             | 1.Death with or without functioning graft<br>2.Death censored graft failure (dialysis/re-transplantation) |                                                     | 1.Graft failure (dialysis/re-transplantation/death)<br>2.Death censored graft failure    |                                                                                                                                                                                                                                                                                                                                                                                                                                                                                                                                                                                                                                                                                                                                                                                                                                                                                                                                                                                                                                                                                                                                                                                                                                                                                                                                                                                 | Graft failure (dialysis/re-transplantation/death)                                                                                                                                                                                              |  |
|                                                                               | Competing event                          |                                                              | No                                                           |                                                   | Death and re-transplantation                                                                                                                                                                                                                                                                                                                                                                             |                                                                                                                                                                                                                                                                                                                             | 1. Dialysis/re-transplantation<br>2. Death with functioning graft                                         |                                                     | 1.No<br>2.Death with functioning graft)                                                  |                                                                                                                                                                                                                                                                                                                                                                                                                                                                                                                                                                                                                                                                                                                                                                                                                                                                                                                                                                                                                                                                                                                                                                                                                                                                                                                                                                                 | No                                                                                                                                                                                                                                             |  |
|                                                                               | Accounted for competing risk             |                                                              |                                                              |                                                   | Not clearly specified                                                                                                                                                                                                                                                                                                                                                                                    |                                                                                                                                                                                                                                                                                                                             | Not clearly specified                                                                                     |                                                     | Not clearly specified                                                                    |                                                                                                                                                                                                                                                                                                                                                                                                                                                                                                                                                                                                                                                                                                                                                                                                                                                                                                                                                                                                                                                                                                                                                                                                                                                                                                                                                                                 |                                                                                                                                                                                                                                                |  |
|                                                                               | Time horizon of prediction               |                                                              | 5 years                                                      |                                                   | 6 months, 1year                                                                                                                                                                                                                                                                                                                                                                                          |                                                                                                                                                                                                                                                                                                                             | 8 years                                                                                                   |                                                     | 1 – 4 years                                                                              |                                                                                                                                                                                                                                                                                                                                                                                                                                                                                                                                                                                                                                                                                                                                                                                                                                                                                                                                                                                                                                                                                                                                                                                                                                                                                                                                                                                 | 1, 3, > 3                                                                                                                                                                                                                                      |  |
| Development cohort type                                                       |                                          | Single center cohort                                         |                                                              | Multi-centers cohort                              |                                                                                                                                                                                                                                                                                                                                                                                                          | Registry: United Network for Organ Sharing<br>Standard Transplant Analysis and Research                                                                                                                                                                                                                                     |                                                                                                           | Single center cohort                                |                                                                                          | Registry: United States Renal Data System                                                                                                                                                                                                                                                                                                                                                                                                                                                                                                                                                                                                                                                                                                                                                                                                                                                                                                                                                                                                                                                                                                                                                                                                                                                                                                                                       |                                                                                                                                                                                                                                                |  |
| Years of Transplantation                                                      |                                          | 1976 – 1992; 1995 - 2007                                     |                                                              | 1994 - 2008                                       |                                                                                                                                                                                                                                                                                                                                                                                                          | 1995 - 2002                                                                                                                                                                                                                                                                                                                 |                                                                                                           | Unspecified                                         |                                                                                          | 2000 - 2001                                                                                                                                                                                                                                                                                                                                                                                                                                                                                                                                                                                                                                                                                                                                                                                                                                                                                                                                                                                                                                                                                                                                                                                                                                                                                                                                                                     |                                                                                                                                                                                                                                                |  |
| Sample size                                                                   |                                          | 1581                                                         |                                                              | 337                                               |                                                                                                                                                                                                                                                                                                                                                                                                          | 36201                                                                                                                                                                                                                                                                                                                       |                                                                                                           | 73 patients (but 75 allografts)                     |                                                                                          | 5144                                                                                                                                                                                                                                                                                                                                                                                                                                                                                                                                                                                                                                                                                                                                                                                                                                                                                                                                                                                                                                                                                                                                                                                                                                                                                                                                                                            |                                                                                                                                                                                                                                                |  |
| Statistical model used                                                        |                                          | 1.Cox regression model<br>2. Artificial neural network (ANN) |                                                              | Linear regression model                           |                                                                                                                                                                                                                                                                                                                                                                                                          | Cox regression model                                                                                                                                                                                                                                                                                                        |                                                                                                           | Logistic regression model                           |                                                                                          | Bayesian Belief Networks (BBNs) using prior information on train population (probability of graft failure at 1 year, 3 years and more than 3 years)<br>Age at diabetes diagnosis, Recipient age at transplant , Body mass index, Cardiac arrest since neurological event that led to declaration of brain death, Cold ischemia pump ki, Combined Cold ischemia pump, Creatinine decline by 0.25 or more in the first 24 h, Donor blood type, Donor age, BMI of cadaveric donor, Cadaveric donor cause of death, Serum creatinine of cadaveric donor, Primary diagnosis, History of diabetes, History of hypertension, Cigarette use, Patient diabetes, Dialysis at listing (recipient), Length of time on dialysis pre-transplant in days, Was this a DCD donor?, Other drug use, Donor race, Donor gender, Estimated warm ischemic time, Graft thrombosis, Cocaine use – ever Induction medications combination, Procedure type, Pump, Are any medicines given currently for maintenance or anti-rejection , CNT HLA A, B, DR mismatch, Most recent serum creatinine prior to discharge, Most recent absolute creatinine at listing, Most recent USRDS PRA(%), Pre-transplant dialysis, Recipient blood type, Recurrent disease, Recipient race, Gender, Serum creatinine at time of transplant, Drug-treated systemic hypertension at listing, Warm ischemia anastomotic time |                                                                                                                                                                                                                                                |  |
| DEVELOPMENT COHORT                                                            | Predictors used in the final model       |                                                              | Predictors measured at transplantation                       |                                                   | 1. For Cox model: recipient age, donor age, haplotype, time to diuresis, total steroid dose, immunosuppression, acute tubular necrosis , number of acute rejection<br>2. For artificial neural networks: recipient age, donor age, haplotype, time to diuresis, total steroid dose, immunosuppression, acute tubular necrosis, number of acute rejection, number of blood transfusions, HLA-A, B, HLA-DR |                                                                                                                                                                                                                                                                                                                             | Age, creatinine clearance, cause of donor death, history of hypertension, HLA mismatch, body weight       |                                                     | Recipient age, history of diabetes mellitus, history of angina, time on dialysis therapy |                                                                                                                                                                                                                                                                                                                                                                                                                                                                                                                                                                                                                                                                                                                                                                                                                                                                                                                                                                                                                                                                                                                                                                                                                                                                                                                                                                                 | At two years:<br>1. Graft failure: gene expression (TNF- $\alpha$ , Bcl-2, IFN- $\gamma$ ), clinical variables (Delayed Graft Function, acute Rejection, systolic blood pressure)<br>2. Death censored graft failure: no significant covariate |  |
|                                                                               |                                          |                                                              |                                                              |                                                   |                                                                                                                                                                                                                                                                                                                                                                                                          |                                                                                                                                                                                                                                                                                                                             |                                                                                                           |                                                     |                                                                                          |                                                                                                                                                                                                                                                                                                                                                                                                                                                                                                                                                                                                                                                                                                                                                                                                                                                                                                                                                                                                                                                                                                                                                                                                                                                                                                                                                                                 | At 3 and 4 years:<br>No significant covariate                                                                                                                                                                                                  |  |
|                                                                               |                                          |                                                              |                                                              |                                                   |                                                                                                                                                                                                                                                                                                                                                                                                          |                                                                                                                                                                                                                                                                                                                             |                                                                                                           |                                                     |                                                                                          |                                                                                                                                                                                                                                                                                                                                                                                                                                                                                                                                                                                                                                                                                                                                                                                                                                                                                                                                                                                                                                                                                                                                                                                                                                                                                                                                                                                 | Systolic and diastolic blood pressure values around the 1-year after transplantation                                                                                                                                                           |  |
|                                                                               |                                          |                                                              |                                                              |                                                   |                                                                                                                                                                                                                                                                                                                                                                                                          |                                                                                                                                                                                                                                                                                                                             |                                                                                                           |                                                     |                                                                                          |                                                                                                                                                                                                                                                                                                                                                                                                                                                                                                                                                                                                                                                                                                                                                                                                                                                                                                                                                                                                                                                                                                                                                                                                                                                                                                                                                                                 | Not clearly specified                                                                                                                                                                                                                          |  |
| Method used to account for post-transplant predictors                         |                                          |                                                              |                                                              |                                                   |                                                                                                                                                                                                                                                                                                                                                                                                          |                                                                                                                                                                                                                                                                                                                             |                                                                                                           |                                                     |                                                                                          | Not clearly specified                                                                                                                                                                                                                                                                                                                                                                                                                                                                                                                                                                                                                                                                                                                                                                                                                                                                                                                                                                                                                                                                                                                                                                                                                                                                                                                                                           |                                                                                                                                                                                                                                                |  |
| Prediction tools presentation form                                            |                                          | 1.Nomogram for Cox model<br>2.Original model for ANN         |                                                              | Score (Nyberg scoring system modified)            |                                                                                                                                                                                                                                                                                                                                                                                                          | Recipient risk score (RRS)<br><br>Threshold defined to separate into 4 risk groups based on expected survival after transplantation.<br>Four recipients groups (RG):<br>- RG1 = RRS<2.555<br>- RG2 = 2.555 < RRS < 3.308<br>- RG3 = 3.308 < RRS < 3.802<br>- RG4 = RRS >3.802<br>Decreasing median survival from RG1 to RG4 |                                                                                                           | Original model                                      |                                                                                          | Original model                                                                                                                                                                                                                                                                                                                                                                                                                                                                                                                                                                                                                                                                                                                                                                                                                                                                                                                                                                                                                                                                                                                                                                                                                                                                                                                                                                  |                                                                                                                                                                                                                                                |  |
| Proposed thresholds for clinical use / Proposed software or online-calculator |                                          |                                                              |                                                              |                                                   |                                                                                                                                                                                                                                                                                                                                                                                                          |                                                                                                                                                                                                                                                                                                                             |                                                                                                           |                                                     |                                                                                          |                                                                                                                                                                                                                                                                                                                                                                                                                                                                                                                                                                                                                                                                                                                                                                                                                                                                                                                                                                                                                                                                                                                                                                                                                                                                                                                                                                                 |                                                                                                                                                                                                                                                |  |
| VALIDATION COHORT                                                             | Internal validation                      |                                                              | Yes                                                          |                                                   | No                                                                                                                                                                                                                                                                                                                                                                                                       |                                                                                                                                                                                                                                                                                                                             | Updated version 1-year RRS (Lorent et al Plos One 2016) in an online calculator at www.divat.fr           |                                                     | Yes                                                                                      |                                                                                                                                                                                                                                                                                                                                                                                                                                                                                                                                                                                                                                                                                                                                                                                                                                                                                                                                                                                                                                                                                                                                                                                                                                                                                                                                                                                 | Yes                                                                                                                                                                                                                                            |  |
|                                                                               | Internal validation type                 |                                                              | Unspecified                                                  |                                                   |                                                                                                                                                                                                                                                                                                                                                                                                          |                                                                                                                                                                                                                                                                                                                             | Unspecified                                                                                               |                                                     | 10 fold cross validation                                                                 |                                                                                                                                                                                                                                                                                                                                                                                                                                                                                                                                                                                                                                                                                                                                                                                                                                                                                                                                                                                                                                                                                                                                                                                                                                                                                                                                                                                 | 1.10 fold cross validation<br>2.Split sample 70%-30%                                                                                                                                                                                           |  |
|                                                                               | External validation                      |                                                              | Yes                                                          |                                                   | Yes                                                                                                                                                                                                                                                                                                                                                                                                      |                                                                                                                                                                                                                                                                                                                             | No                                                                                                        |                                                     | No                                                                                       |                                                                                                                                                                                                                                                                                                                                                                                                                                                                                                                                                                                                                                                                                                                                                                                                                                                                                                                                                                                                                                                                                                                                                                                                                                                                                                                                                                                 | Yes                                                                                                                                                                                                                                            |  |
|                                                                               | External validation type                 |                                                              | Temporal                                                     |                                                   | Spatial                                                                                                                                                                                                                                                                                                                                                                                                  |                                                                                                                                                                                                                                                                                                                             |                                                                                                           |                                                     |                                                                                          |                                                                                                                                                                                                                                                                                                                                                                                                                                                                                                                                                                                                                                                                                                                                                                                                                                                                                                                                                                                                                                                                                                                                                                                                                                                                                                                                                                                 | Temporal                                                                                                                                                                                                                                       |  |
|                                                                               | External validation cohort (sample size) |                                                              | Transplanted in 1992 -1995 (319)                             |                                                   | Transplanted in Asan medical center in 1995 – 2003 (102)                                                                                                                                                                                                                                                                                                                                                 |                                                                                                                                                                                                                                                                                                                             |                                                                                                           |                                                     |                                                                                          |                                                                                                                                                                                                                                                                                                                                                                                                                                                                                                                                                                                                                                                                                                                                                                                                                                                                                                                                                                                                                                                                                                                                                                                                                                                                                                                                                                                 | Transplanted in 1997, 2002 and 2003                                                                                                                                                                                                            |  |
| PER                                                                           | Overall                                  |                                                              |                                                              |                                                   |                                                                                                                                                                                                                                                                                                                                                                                                          |                                                                                                                                                                                                                                                                                                                             |                                                                                                           |                                                     |                                                                                          |                                                                                                                                                                                                                                                                                                                                                                                                                                                                                                                                                                                                                                                                                                                                                                                                                                                                                                                                                                                                                                                                                                                                                                                                                                                                                                                                                                                 |                                                                                                                                                                                                                                                |  |
|                                                                               | Discrimination                           |                                                              | validation models      AUC      Sensitivity /specificity (%) |                                                   |                                                                                                                                                                                                                                                                                                                                                                                                          |                                                                                                                                                                                                                                                                                                                             | AUC=0.692 for death model                                                                                 |                                                     | AUC at two years prediction for graft failure<br>Gene expression only: 0.577             |                                                                                                                                                                                                                                                                                                                                                                                                                                                                                                                                                                                                                                                                                                                                                                                                                                                                                                                                                                                                                                                                                                                                                                                                                                                                                                                                                                                 | Validation    Year      AUC      Sensitivity/speci ficity                                                                                                                                                                                      |  |



| Author and years (journal)                                                    |                                                       | Carl van Walraven et al. 2010 (27)<br>(Canadian Medical Association Journal)                                                                                                                                                                       | Dahle et al 2015(29)<br>(Transplantation)                                                                                              | De Vusser et al 2013 (30)<br>(Journal of American Society of Nephrology)                                                                                                                                                                                                                                                                                                                 | Einecke et al. 2010 (31)<br>(Journal of Clinical Investigation)                                                                                              | Foucher et al. 2010 (33)<br>(Kidney International)                                                                                                                                                                                            |
|-------------------------------------------------------------------------------|-------------------------------------------------------|----------------------------------------------------------------------------------------------------------------------------------------------------------------------------------------------------------------------------------------------------|----------------------------------------------------------------------------------------------------------------------------------------|------------------------------------------------------------------------------------------------------------------------------------------------------------------------------------------------------------------------------------------------------------------------------------------------------------------------------------------------------------------------------------------|--------------------------------------------------------------------------------------------------------------------------------------------------------------|-----------------------------------------------------------------------------------------------------------------------------------------------------------------------------------------------------------------------------------------------|
| Type of study                                                                 |                                                       | Development and validation of a new model (in both transplanted and dialysis patients)                                                                                                                                                             | Development and validation of a new model                                                                                              | Development and validation of a new model                                                                                                                                                                                                                                                                                                                                                | Development and validation of a new model                                                                                                                    | Development and validation of a new model                                                                                                                                                                                                     |
| Donor type                                                                    |                                                       | Living and deceased donors                                                                                                                                                                                                                         | Unspecified                                                                                                                            | Unspecified                                                                                                                                                                                                                                                                                                                                                                              | Unspecified                                                                                                                                                  | Deceased donors                                                                                                                                                                                                                               |
| Recipient age range                                                           |                                                       | Age ≥ 18 years and < 100 years                                                                                                                                                                                                                     | ≥16 years                                                                                                                              | Adult (Age range unspecified)                                                                                                                                                                                                                                                                                                                                                            | Unspecified                                                                                                                                                  | ≥ 18 years                                                                                                                                                                                                                                    |
| OUTCOMES                                                                      | Studied event                                         | Death with or without functioning graft                                                                                                                                                                                                            | Death (Any cause)                                                                                                                      | 1. Graft failure (dialysis/re-transplantation/death)<br>2. Death-censored graft failure                                                                                                                                                                                                                                                                                                  | Death censored graft failure (dialysis-re-transplantation)                                                                                                   | Death censored graft failure (Dialysis/re-transplantation)                                                                                                                                                                                    |
|                                                                               | Competing event                                       | Dialysis/re-transplantation                                                                                                                                                                                                                        | Dialysis/re-transplantation                                                                                                            | 1. No<br>2. Death with functioning graft                                                                                                                                                                                                                                                                                                                                                 | Death with functioning graft                                                                                                                                 | Death with functioning graft                                                                                                                                                                                                                  |
|                                                                               | Accounted for competing risk                          | Not clearly specified                                                                                                                                                                                                                              | Not clearly specified                                                                                                                  | Not clearly specified                                                                                                                                                                                                                                                                                                                                                                    | Not clearly specified                                                                                                                                        | Not clearly specified                                                                                                                                                                                                                         |
| Time horizon of prediction                                                    |                                                       |                                                                                                                                                                                                                                                    | Not reported (5 years an example in supplement material)                                                                               | 3, 5 and 10                                                                                                                                                                                                                                                                                                                                                                              | Not reported                                                                                                                                                 | 8 years (after first anniversary of transplantation )                                                                                                                                                                                         |
| Development cohort type                                                       |                                                       | Multi-center cohort                                                                                                                                                                                                                                | Single center cohort                                                                                                                   | Single center                                                                                                                                                                                                                                                                                                                                                                            | Multi – center                                                                                                                                               | Multi – center Cohort                                                                                                                                                                                                                         |
| Years of transplantation                                                      |                                                       | 1995 - 2006                                                                                                                                                                                                                                        | 2007 - 2012                                                                                                                            | 1991 – 2004                                                                                                                                                                                                                                                                                                                                                                              | 2004 – 2007 (Alberta)<br>2006- 2007 (Illinois)                                                                                                               | 1996 - 2007                                                                                                                                                                                                                                   |
| Sample size                                                                   |                                                       | 84724                                                                                                                                                                                                                                              | 1497                                                                                                                                   | 181 transplanted before 2004                                                                                                                                                                                                                                                                                                                                                             | 105 biopsies                                                                                                                                                 | 2169                                                                                                                                                                                                                                          |
| Statistical model used                                                        |                                                       | Cox regression model                                                                                                                                                                                                                               | Cox regression model                                                                                                                   | Logistic regression model (Used logistic regression to build a score after Cox model analysis)                                                                                                                                                                                                                                                                                           | Cox regression model                                                                                                                                         | Cox regression model                                                                                                                                                                                                                          |
| DEVELOPMENT COHORT                                                            | Predictors measured at transplantation                | Age, race, cause of kidney failure, body mass index, comorbid disease, smoking, employment status, serum albumin level, year of first renal replacement therapy, kidney transplantation, time to transplant waiting-list, time on the waiting list | Recipient age and sex, coronary heart disease, smoking status, time in renal replacement therapy, creatinine, diabetes, pulse pressure | For graft failure: interstitial fibrosis, tubular atrophy, donor age, glomerulosclerosis<br>For death censored graft failure: interstitial fibrosis, tubular atrophy, glomerulosclerosis                                                                                                                                                                                                 | Molecular risk score, peritubular capillary basement membrane multi-layering, arteriolar hyalinosis, proteinuria.<br>Note: date at biopsy is a baseline date | Donor creatinine, recipient age, recipient sex, number of previous transplantations,                                                                                                                                                          |
|                                                                               | Predictors measured after transplantation             |                                                                                                                                                                                                                                                    | Pulse wave velocity at 8 weeks after transplantation                                                                                   |                                                                                                                                                                                                                                                                                                                                                                                          |                                                                                                                                                              | Acute rejection during the first year post-transplant, Creatinine at 3 month, creatinine at 12 month, proteinuria at 12 month                                                                                                                 |
|                                                                               | Method used to account for post-transplant predictors |                                                                                                                                                                                                                                                    | Used the predictor as a baseline variable                                                                                              |                                                                                                                                                                                                                                                                                                                                                                                          |                                                                                                                                                              | Only patients alive with transplant function at 12 months were selected to develop the model                                                                                                                                                  |
| Prediction tools presentation form                                            |                                                       | Index score                                                                                                                                                                                                                                        | Original model                                                                                                                         | Index score (Leuven donor risk score)                                                                                                                                                                                                                                                                                                                                                    | Score                                                                                                                                                        | Kidney Transplant Failure Score (KTFS)<br>Threshold defined at 4.77 after sensitivity/specificity analysis. Two risk grade groups:<br>- Grade1 : KTFS less than 4.77 (Lower risk group)<br>- Grade2 : KTFS more than 4.77 (Higher risk group) |
| Proposed thresholds for clinical use / Proposed software or online-calculator |                                                       |                                                                                                                                                                                                                                                    |                                                                                                                                        | Threshold defined at 47 after sensibility/specificity analysis                                                                                                                                                                                                                                                                                                                           | Threshold defined at median score.<br>Two risk groups:<br>- Lower risk group less than score median<br>- Higher risk group more than score median            | Online calculator at <a href="http://www.divat.fr">www.divat.fr</a>                                                                                                                                                                           |
| VALIDATION COHORT                                                             | Internal validation                                   | Yes                                                                                                                                                                                                                                                | Yes                                                                                                                                    | No                                                                                                                                                                                                                                                                                                                                                                                       | Yes                                                                                                                                                          | Yes                                                                                                                                                                                                                                           |
|                                                                               | Internal validation type                              | Split-sample 50%, 50%                                                                                                                                                                                                                              | Bootstrapping                                                                                                                          |                                                                                                                                                                                                                                                                                                                                                                                          | 10 fold Cross-validation                                                                                                                                     | Cross-validation                                                                                                                                                                                                                              |
|                                                                               | External validation                                   | No                                                                                                                                                                                                                                                 | No                                                                                                                                     | Yes                                                                                                                                                                                                                                                                                                                                                                                      | Yes                                                                                                                                                          | Yes                                                                                                                                                                                                                                           |
| External validation type                                                      |                                                       |                                                                                                                                                                                                                                                    |                                                                                                                                        | Temporal                                                                                                                                                                                                                                                                                                                                                                                 | Spatial                                                                                                                                                      | Spatial                                                                                                                                                                                                                                       |
| External validation cohort (sample size)                                      |                                                       |                                                                                                                                                                                                                                                    |                                                                                                                                        | Transplanted after 2004 (n=367)                                                                                                                                                                                                                                                                                                                                                          | Recipients transplanted between 2006 and 2007 from Minnesota (48 biopsies)                                                                                   | Transplanted from Caen, Grenoble, Tours, and Strasbourg (317)                                                                                                                                                                                 |
| Overall                                                                       |                                                       |                                                                                                                                                                                                                                                    | Nagelkerke's R2 : 0.12<br>0.12 for prediction at 5 years                                                                               |                                                                                                                                                                                                                                                                                                                                                                                          |                                                                                                                                                              |                                                                                                                                                                                                                                               |
| PERFORMANCES                                                                  | Discrimination                                        | AUC<br>0.746                                                                                                                                                                                                                                       | AUC<br>0.78 for overall model<br>0.78 for prediction at 5 years                                                                        | AUC for graft failure:<br>For development cohort<br>0.70 at 3yrs, 0.67 for 5 years and 0.60 for 10 yrs<br>For validation cohort<br>0.70 at 3 yrs, 0.81 at 5 yrs, Not calculated at 10 years because 10-year survival data were not available in the validation cohort<br>Sensitivity/specificity at 5 years for validation cohort<br>85%/81% at 47 threshold:<br>90%/60% at 60 threshold | AUC 0.83 for internal validation<br>sensitivity of 0.83 and specificity 0.63                                                                                 | AUC at 8 years:<br>- 0.78 for internal validation<br>- 0.78 for external validation<br>For internal validation (KTFS cut off at 4.17):<br>Sensibility 0.72, specificity 0.71                                                                  |
| Calibration                                                                   |                                                       | Agreement between index score and risk of death at five years                                                                                                                                                                                      | Calibration slope 0.89 for overall model;<br>0.87 for prediction at 5 years                                                            |                                                                                                                                                                                                                                                                                                                                                                                          | Agreement of predicted risk and score of graft failure                                                                                                       |                                                                                                                                                                                                                                               |
| Other performance indicator                                                   |                                                       |                                                                                                                                                                                                                                                    |                                                                                                                                        |                                                                                                                                                                                                                                                                                                                                                                                          |                                                                                                                                                              |                                                                                                                                                                                                                                               |
| Other studies used for comparison                                             |                                                       |                                                                                                                                                                                                                                                    |                                                                                                                                        | AUC evaluated in same population<br>At 3 year At 5 years At 10 years<br>Remuzzi et al 2006 0.62 0.62 0.59<br>Lopes et al 2005 0.55 0.59 0.59<br>Snoeijns et al 2008 0.6 0.6 0.59                                                                                                                                                                                                         |                                                                                                                                                              |                                                                                                                                                                                                                                               |
| Number of citation in google scholar at 31/04/16                              |                                                       | 30                                                                                                                                                                                                                                                 | 5                                                                                                                                      | 18                                                                                                                                                                                                                                                                                                                                                                                       | 91                                                                                                                                                           | 25                                                                                                                                                                                                                                            |

| Author and years (journal)                       |                                                                               | Fritsche et al. 2005 (34)<br>(Transplantation Proceeding)                                                                                                                                                          | Grams et al. 2012 (35)<br>(Clinical Investigation)                                                                                                                                                                                                                                                                                                                                         | Greco et al. 2010 (36)<br>(Transplantation Proceeding)                                              | Gourishankar et al 2013 (59)<br>(Clinical Transplantation)                                                                                                   | Gusukuma LW, 2014 (54)<br>(Journal Brasileiro de Nefrologia)                                                                                                        |
|--------------------------------------------------|-------------------------------------------------------------------------------|--------------------------------------------------------------------------------------------------------------------------------------------------------------------------------------------------------------------|--------------------------------------------------------------------------------------------------------------------------------------------------------------------------------------------------------------------------------------------------------------------------------------------------------------------------------------------------------------------------------------------|-----------------------------------------------------------------------------------------------------|--------------------------------------------------------------------------------------------------------------------------------------------------------------|---------------------------------------------------------------------------------------------------------------------------------------------------------------------|
| Type of study                                    |                                                                               | Development and validation of a new model                                                                                                                                                                          | Development and validation of a new model                                                                                                                                                                                                                                                                                                                                                  | Development and validation of a new model                                                           | Validation without any model updating                                                                                                                        | Development and validation of a new model                                                                                                                           |
| Donor type                                       |                                                                               | Living and deceased donor                                                                                                                                                                                          | Donor type unspecified                                                                                                                                                                                                                                                                                                                                                                     | Donor type unspecified                                                                              | Deceased donor                                                                                                                                               | Deceased donor                                                                                                                                                      |
| Recipient age range                              |                                                                               | Adult (Age range unspecified)                                                                                                                                                                                      | aged > 65                                                                                                                                                                                                                                                                                                                                                                                  | ≥ 18 years                                                                                          | Adult (Age range unspecified)                                                                                                                                | >18 years                                                                                                                                                           |
| OUTCOMES                                         | Studied event                                                                 | Death censored graft failure (Dialysis/re-transplantation)                                                                                                                                                         | Death with or without functioning graft                                                                                                                                                                                                                                                                                                                                                    | Graft failure (undefined)                                                                           | Death censored graft failure (dialysis/re-transplantation)                                                                                                   | Graft failure (death or graft with creatinine > 1.5 mg/dl)                                                                                                          |
|                                                  | Competing event                                                               | Death with functioning graft                                                                                                                                                                                       | Dialysis/re-transplantation                                                                                                                                                                                                                                                                                                                                                                | Depends on graft failure definition                                                                 | Death with functioning graft                                                                                                                                 | Return to dialysis /re-transplantation                                                                                                                              |
|                                                  | Accounted for competing risk                                                  | Not clearly specified                                                                                                                                                                                              | Not clearly specified                                                                                                                                                                                                                                                                                                                                                                      | Not clearly specified                                                                               | Not clearly specified                                                                                                                                        | Not clearly specified                                                                                                                                               |
| Horizon of prediction                            |                                                                               | 4 years                                                                                                                                                                                                            | 3 years (1, 2, and 5 years for sensitivity)                                                                                                                                                                                                                                                                                                                                                | 5 years                                                                                             | Long-term (unspecified)                                                                                                                                      | 6 months                                                                                                                                                            |
| DEVELOPMENT COHORT                               | Development cohort type                                                       | Multi-center Cohort                                                                                                                                                                                                | Registry: United States Renal Data System                                                                                                                                                                                                                                                                                                                                                  | Single center cohort                                                                                | Single center cohort                                                                                                                                         | Single center                                                                                                                                                       |
|                                                  | Years of transplantation                                                      | 1981 - 2004                                                                                                                                                                                                        | 1999 - 2006                                                                                                                                                                                                                                                                                                                                                                                | Unspecified                                                                                         | 1990 - 2004                                                                                                                                                  | February - November 2011                                                                                                                                            |
|                                                  | Sample size                                                                   | 497                                                                                                                                                                                                                | 6988                                                                                                                                                                                                                                                                                                                                                                                       | 194                                                                                                 |                                                                                                                                                              | 311                                                                                                                                                                 |
|                                                  | Statistical model used                                                        | Decision-tree<br>Hill-Climbing algorithm                                                                                                                                                                           | Logistic regression model                                                                                                                                                                                                                                                                                                                                                                  | Decision tree model                                                                                 | Calculation of individual score value                                                                                                                        | Logistic regression                                                                                                                                                 |
|                                                  | Predictors measured at transplantation                                        |                                                                                                                                                                                                                    | Age, dialysis time, sex, congestive heart failure, cardiac arrhythmia, complicated diabetes mellitus, chronic pulmonary disease, coronary artery disease, hypertension, drug dependence, peripheral vascular disease, polycystic kidney disease, deficiency anemia, other neurological disorder, liver disease, depression, peptic ulcer disease, current smoking, year of transplantation | Delayed graft function, acute rejection episode, and chronic allograft nephropathy, body mass index | Deceased donor score (DDS) (Nyeberg et al, 2003)<br>Donor risk score (DRS) (Schold et al, 2005)(51)<br>kidney donor risk index (KDRI){ (Rao et al, 2009)(45) | Sex, recipient weight, DR mismatch, public aid/welfare, patient monthly income, to have a children, family support, ECG alteration, donor death etiology, donor age |
|                                                  | Predictors used in the final model                                            | Cold ischemia time, single kidney transplantation, creatinine mean and slope                                                                                                                                       |                                                                                                                                                                                                                                                                                                                                                                                            |                                                                                                     |                                                                                                                                                              |                                                                                                                                                                     |
|                                                  | Predictors measured after transplantation                                     | Creatinine at 60 to 180 day post-transplant (Used median and slope creatinine between day 60 and 180 after transplantation)                                                                                        |                                                                                                                                                                                                                                                                                                                                                                                            |                                                                                                     |                                                                                                                                                              |                                                                                                                                                                     |
|                                                  | Method used to account for post-transplant predictors                         | Not clearly specified                                                                                                                                                                                              |                                                                                                                                                                                                                                                                                                                                                                                            |                                                                                                     |                                                                                                                                                              |                                                                                                                                                                     |
|                                                  | Prediction tools presentation form                                            | Original model                                                                                                                                                                                                     | Original model                                                                                                                                                                                                                                                                                                                                                                             | Original model                                                                                      | Existing score                                                                                                                                               | Score                                                                                                                                                               |
|                                                  | Proposed thresholds for clinical use / Proposed software or online-calculator |                                                                                                                                                                                                                    |                                                                                                                                                                                                                                                                                                                                                                                            |                                                                                                     |                                                                                                                                                              | No threshold, but proposed a simple score derivation (range 0-56), and a probability of success of a transplantation for a given score                              |
| VALIDATION COHORT                                | Internal validation                                                           | Yes                                                                                                                                                                                                                | Yes                                                                                                                                                                                                                                                                                                                                                                                        | Yes                                                                                                 | No                                                                                                                                                           | Yes                                                                                                                                                                 |
|                                                  | Internal validation type                                                      | Split-sample 50%, 50%                                                                                                                                                                                              | 1. Five-fold cross-validation<br>2. Random forest                                                                                                                                                                                                                                                                                                                                          | Leave-one out cross validation                                                                      |                                                                                                                                                              | unspecified                                                                                                                                                         |
|                                                  | External validation                                                           | No                                                                                                                                                                                                                 | Yes                                                                                                                                                                                                                                                                                                                                                                                        | No                                                                                                  | Yes                                                                                                                                                          | No                                                                                                                                                                  |
|                                                  | External validation type                                                      |                                                                                                                                                                                                                    | Spatial                                                                                                                                                                                                                                                                                                                                                                                    |                                                                                                     | Fully                                                                                                                                                        |                                                                                                                                                                     |
|                                                  | External validation cohort (sample size)                                      |                                                                                                                                                                                                                    | Transplanted from scientific transplant registry database (2728)                                                                                                                                                                                                                                                                                                                           |                                                                                                     | 730                                                                                                                                                          |                                                                                                                                                                     |
| PERFORMANCES                                     | Overall                                                                       |                                                                                                                                                                                                                    |                                                                                                                                                                                                                                                                                                                                                                                            |                                                                                                     |                                                                                                                                                              |                                                                                                                                                                     |
|                                                  | Discrimination                                                                | When decision tree algorithm applied:<br>Sensitivity 42.3% for creatinine cut-off at 3.1mg/dl<br>When Hill-Climbing algorithm applied for creatinine cut-off at 1.8 mg/dl:<br>Sensitivity 69.5%, specificity 79.0% | AUC:<br>- 0.66 in development cohort<br>- 0.68 by cross-validation                                                                                                                                                                                                                                                                                                                         | 88.2% sensitivity<br>73.8% specificity                                                              |                                                                                                                                                              | AUC=0.817                                                                                                                                                           |
|                                                  | Calibration                                                                   |                                                                                                                                                                                                                    | Hosmer-Lemeshow test (p-value=0.44) for 3 years                                                                                                                                                                                                                                                                                                                                            |                                                                                                     | Agreement between each score level and observed graft survival                                                                                               | Hosmer-lemeshow test (p=0.672)<br>Agreement between estimated probability and observed graft survival (r2=0.982)                                                    |
|                                                  | Reclassification                                                              |                                                                                                                                                                                                                    |                                                                                                                                                                                                                                                                                                                                                                                            |                                                                                                     |                                                                                                                                                              |                                                                                                                                                                     |
| Other performance indicator                      |                                                                               |                                                                                                                                                                                                                    |                                                                                                                                                                                                                                                                                                                                                                                            |                                                                                                     |                                                                                                                                                              |                                                                                                                                                                     |
| Other studies used for comparison                |                                                                               |                                                                                                                                                                                                                    |                                                                                                                                                                                                                                                                                                                                                                                            |                                                                                                     |                                                                                                                                                              |                                                                                                                                                                     |
| Number of citation in google scholar at 31/04/16 |                                                                               | 8                                                                                                                                                                                                                  | 29                                                                                                                                                                                                                                                                                                                                                                                         | 6                                                                                                   | 7                                                                                                                                                            | 0                                                                                                                                                                   |

| Author and years (journal)                       |                                                                               | Hemke et al. 2013 (37) (BMC Nephrology)                                                                                                                    | Hernández et al. 2005 (38) (Transplantation)                                                                                                                                                                                       | Hernández et al. 2009 (39) (Transplantation)                                                                                                                                                                                      | Ho et al. 2013 (40) (Transplantation)                                                                                                                                                     | Jassal et al. 2005 (62) (American Journal of Kidney Diseases)                                                                                                                                                                                                          |
|--------------------------------------------------|-------------------------------------------------------------------------------|------------------------------------------------------------------------------------------------------------------------------------------------------------|------------------------------------------------------------------------------------------------------------------------------------------------------------------------------------------------------------------------------------|-----------------------------------------------------------------------------------------------------------------------------------------------------------------------------------------------------------------------------------|-------------------------------------------------------------------------------------------------------------------------------------------------------------------------------------------|------------------------------------------------------------------------------------------------------------------------------------------------------------------------------------------------------------------------------------------------------------------------|
| Type of study                                    |                                                                               | Development and validation of a new model (in both transplanted and dialysis patients)                                                                     | Development and validation of a new model                                                                                                                                                                                          |                                                                                                                                                                                                                                   | Development and validation of a new model                                                                                                                                                 | Validation with updating the model                                                                                                                                                                                                                                     |
| Donor type                                       |                                                                               | Donor type unspecified                                                                                                                                     | Deceased donor                                                                                                                                                                                                                     | Donor type unspecified                                                                                                                                                                                                            | Donor type unspecified                                                                                                                                                                    | Living and deceased donor                                                                                                                                                                                                                                              |
| Recipient age range                              |                                                                               | ≥ 16 years                                                                                                                                                 | Adult (Age range unspecified)                                                                                                                                                                                                      | ≥ 18 years                                                                                                                                                                                                                        | Adult (Age range unspecified)                                                                                                                                                             | Adult (Age range unspecified)                                                                                                                                                                                                                                          |
| OUTCOMES                                         | Studied event                                                                 | Death with or without functioning graft                                                                                                                    | Death(any cause)                                                                                                                                                                                                                   | Death(any cause)                                                                                                                                                                                                                  | Death censored graft failure (dialysis/re-transplantation)                                                                                                                                | Death with or without functioning graft                                                                                                                                                                                                                                |
|                                                  | Competing event                                                               | Dialysis/re-transplantation                                                                                                                                | Dialysis/re-transplantation                                                                                                                                                                                                        | Dialysis/re-transplantation                                                                                                                                                                                                       | Death with functioning graft                                                                                                                                                              | Dialysis/re-transplantation                                                                                                                                                                                                                                            |
|                                                  | Accounted for competing risk                                                  | Not clearly specified                                                                                                                                      | Not clearly specified                                                                                                                                                                                                              | Not clearly specified                                                                                                                                                                                                             | Not clearly specified                                                                                                                                                                     | Not clearly specified                                                                                                                                                                                                                                                  |
| Time horizon of prediction                       |                                                                               | 3, 5 and 10 years                                                                                                                                          | 2, 5 and 8 years                                                                                                                                                                                                                   | 3 years                                                                                                                                                                                                                           | Long-term (unspecified)                                                                                                                                                                   | Not reported                                                                                                                                                                                                                                                           |
| DEVELOPMENT COHORT                               | Development cohort type                                                       | Registry: Dutch renal replacement registry                                                                                                                 | Single center Cohort                                                                                                                                                                                                               | Single center Cohort                                                                                                                                                                                                              | Single center Cohort                                                                                                                                                                      | Registry: Canadian Organ Replacement Registry (CORR)                                                                                                                                                                                                                   |
|                                                  | Years of transplantation                                                      | 1995 – 2005 (date of start RRT)                                                                                                                            | 1981 - 2001                                                                                                                                                                                                                        | 1990 - 2002                                                                                                                                                                                                                       | 1997 - 2008                                                                                                                                                                               | 1988 - 1998                                                                                                                                                                                                                                                            |
|                                                  | Sample size                                                                   | 6934                                                                                                                                                       | 646                                                                                                                                                                                                                                | 2452                                                                                                                                                                                                                              | 231                                                                                                                                                                                       | 6324                                                                                                                                                                                                                                                                   |
|                                                  | Statistical model used                                                        | Cox regression model                                                                                                                                       | Cox regression model                                                                                                                                                                                                               | Cox regression model                                                                                                                                                                                                              | Cox regression model                                                                                                                                                                      | Cox regression model<br>Comorbidity index:                                                                                                                                                                                                                             |
|                                                  | Predictors measured at transplantation                                        | Age, sex, primary renal disease and therapy at 90 days (Therapy at 90 days was used as baseline predictor)                                                 | Age, pretransplant cardiovascular disease, cardiac hypertrophy, vascular calcification, diabetes, time on dialysis                                                                                                                 | Recipient age, hepatitis C infection and pre-transplant diabetes                                                                                                                                                                  | 1.for overall population: Delayed Graft Function and Donor-specific antibody<br>2.for recipient who have available clinical data at six months.; Delayed Graft Function and Recipient age | Model 1. Charlson Comorbidity Index (CCI ) (Charlson et al, 1987)<br>Model 2. Khan index (Khan et al, 1993)<br>Model 3. Davies index (Davies et al 2002)<br>Model 4. Modified CCI (Hemmelgarn et al, 2003)<br>Model 5. Categorized CCI<br>Model 6: Log-transformed CCI |
|                                                  | Predictors used in the final model                                            |                                                                                                                                                            |                                                                                                                                                                                                                                    |                                                                                                                                                                                                                                   |                                                                                                                                                                                           | All models were adjusted for covariates (age, sex, cause of renal disease)                                                                                                                                                                                             |
|                                                  | Predictors measured after transplantation                                     |                                                                                                                                                            | Acute tubular necrosis and renal function at discharge expressed as serum creatinine in the first week after transplantation                                                                                                       | Proteinuria and serum creatinine at one-year post-transplant, use of tacrolimus or mycophenolate mofetil during the first year post-transplant, new onset of diabetes after transplantation                                       | Urinary Monocyte chemoattractant protein 1 (CCL2), at 6 months                                                                                                                            |                                                                                                                                                                                                                                                                        |
|                                                  | Method used to account for post-transplant predictors                         |                                                                                                                                                            | Not clearly specified                                                                                                                                                                                                              | Not clearly specified                                                                                                                                                                                                             | Only patients alive with transplant function at 6 months were selected to develop the model                                                                                               |                                                                                                                                                                                                                                                                        |
|                                                  | Prediction tools presentation form                                            | Index score                                                                                                                                                | Index score                                                                                                                                                                                                                        | Index score                                                                                                                                                                                                                       | Original model                                                                                                                                                                            | Updating existing index                                                                                                                                                                                                                                                |
|                                                  | Proposed thresholds for clinical use / Proposed software or online-calculator | Threshold defined at tertiles points<br>Calculate individual prognostic score                                                                              | Threshold defined at tertiles points<br>Three risk group (score total = 8 points):<br>- Lower risk :Index score < 2nd tertile<br>- Median risk : Index score between 1th and 2nd tertile<br>- High risk: Index score > 1th tertile | Threshold defined at quintiles points.<br>Four risk groups (score rang: 40- 200):<br>- Group1 : index score <40<br>- Group2 : index score from 40 to 120<br>- Group3 : index score from 120 to 200<br>- Group4 : index score >200 |                                                                                                                                                                                           |                                                                                                                                                                                                                                                                        |
| VALIDATION COHORT                                | Internal validation                                                           | Yes                                                                                                                                                        | Yes                                                                                                                                                                                                                                | Yes                                                                                                                                                                                                                               | Yes                                                                                                                                                                                       | Yes                                                                                                                                                                                                                                                                    |
|                                                  | Internal validation type                                                      | Split-sample 50%, 50%                                                                                                                                      | Split-sample 50%, 50%                                                                                                                                                                                                              | Split-sample 50%, 50%                                                                                                                                                                                                             | unspecified                                                                                                                                                                               | Cross-validation                                                                                                                                                                                                                                                       |
|                                                  | External validation                                                           | No                                                                                                                                                         | No                                                                                                                                                                                                                                 | No                                                                                                                                                                                                                                | No                                                                                                                                                                                        | No                                                                                                                                                                                                                                                                     |
|                                                  | External validation type                                                      |                                                                                                                                                            |                                                                                                                                                                                                                                    |                                                                                                                                                                                                                                   |                                                                                                                                                                                           |                                                                                                                                                                                                                                                                        |
|                                                  | External validation cohort (sample size)                                      |                                                                                                                                                            |                                                                                                                                                                                                                                    |                                                                                                                                                                                                                                   |                                                                                                                                                                                           |                                                                                                                                                                                                                                                                        |
| PERFORMANCES                                     | Overall                                                                       |                                                                                                                                                            |                                                                                                                                                                                                                                    |                                                                                                                                                                                                                                   |                                                                                                                                                                                           |                                                                                                                                                                                                                                                                        |
|                                                  | Discrimination                                                                | AUC<br>0.70 at 3 years<br>0.72 at 5 years<br>0.72 at 10 years                                                                                              | AUC<br>0.60 for development group<br>0.63 for validation group                                                                                                                                                                     | AUC<br>0.75 for development group<br>0.74 for validation group                                                                                                                                                                    | AUC<br>0.89 for overall population<br>0.87 for recipient who have available clinical data at six months                                                                                   | AUC<br>0.74 for model 6                                                                                                                                                                                                                                                |
|                                                  | Calibration                                                                   | Calibration slope: 0.948 for 3 years, 0.99 for 5 years and 1.025 for 10 years.<br>Agreement between observed outcomes and predicted survival probabilities | Agreement between observed outcomes and predicted survival probabilities                                                                                                                                                           |                                                                                                                                                                                                                                   |                                                                                                                                                                                           |                                                                                                                                                                                                                                                                        |
|                                                  | Reclassification                                                              |                                                                                                                                                            |                                                                                                                                                                                                                                    |                                                                                                                                                                                                                                   |                                                                                                                                                                                           |                                                                                                                                                                                                                                                                        |
|                                                  | Other performance indicator                                                   |                                                                                                                                                            |                                                                                                                                                                                                                                    |                                                                                                                                                                                                                                   |                                                                                                                                                                                           |                                                                                                                                                                                                                                                                        |
| Other studies used for comparison                |                                                                               |                                                                                                                                                            |                                                                                                                                                                                                                                    |                                                                                                                                                                                                                                   |                                                                                                                                                                                           |                                                                                                                                                                                                                                                                        |
| Number of citation in google scholar at 31/04/16 |                                                                               | 2                                                                                                                                                          | 32                                                                                                                                                                                                                                 | 26                                                                                                                                                                                                                                | 12                                                                                                                                                                                        | 27                                                                                                                                                                                                                                                                     |

| Author and years (journal) |                                                                               | Kasiske, et al. 2010 (41)<br>(American Journal of Kidney Diseases)                                                                                                                                                                                                                                                                                     | Kikić et al. 2014 (42)<br>(European Journal for Clinical Investigation)                                                                                                                      | Krikov et al.2007 (43)<br>(American Society for Artificial Internal Organ Journal)                                                                                                                                                                                                                                                                                                                                                                                                                                                      | Lin, et al.2008 (32)<br>(Journal of Biomedical Informatics)                                                                                                                                                                                                                                     | Loupy et al. 2014 (46)<br>(Journal of American Society of Nephrology)                                                                      |
|----------------------------|-------------------------------------------------------------------------------|--------------------------------------------------------------------------------------------------------------------------------------------------------------------------------------------------------------------------------------------------------------------------------------------------------------------------------------------------------|----------------------------------------------------------------------------------------------------------------------------------------------------------------------------------------------|-----------------------------------------------------------------------------------------------------------------------------------------------------------------------------------------------------------------------------------------------------------------------------------------------------------------------------------------------------------------------------------------------------------------------------------------------------------------------------------------------------------------------------------------|-------------------------------------------------------------------------------------------------------------------------------------------------------------------------------------------------------------------------------------------------------------------------------------------------|--------------------------------------------------------------------------------------------------------------------------------------------|
| Type of study              |                                                                               | Development and validation of a new model                                                                                                                                                                                                                                                                                                              | Development and validation of a new model                                                                                                                                                    | Development and validation of a new model                                                                                                                                                                                                                                                                                                                                                                                                                                                                                               | Development and validation of a new model                                                                                                                                                                                                                                                       | Development and validation of a new model                                                                                                  |
| Donor type                 |                                                                               | Deceased donor                                                                                                                                                                                                                                                                                                                                         | Donor type unspecified                                                                                                                                                                       | Donor type unspecified                                                                                                                                                                                                                                                                                                                                                                                                                                                                                                                  | Living and deceased donors                                                                                                                                                                                                                                                                      | Donor type unspecified                                                                                                                     |
| Recipient age range        |                                                                               | ≥ 18 years                                                                                                                                                                                                                                                                                                                                             | Adult (Age range unspecified)                                                                                                                                                                | Pediatric and Adult (Age range unspecified)                                                                                                                                                                                                                                                                                                                                                                                                                                                                                             | ≥ 18 years                                                                                                                                                                                                                                                                                      | Adult (Age range unspecified)                                                                                                              |
| OUTCOMES                   | Studied event                                                                 | 1. Graft failure (dialysis/re-transplantation/death)<br>2. Death censored graft failure (dialysis/re-transplantation)<br>3. Death with functioning graft                                                                                                                                                                                               | 1.Death (with and without function graft<br>2.Death censored graft failure                                                                                                                   | Death censored graft failure (dialysis/re-transplantation)                                                                                                                                                                                                                                                                                                                                                                                                                                                                              | 1.Death-censored graft failure (dialysis/re-transplantation)<br>2.Death (any cause)                                                                                                                                                                                                             | Death censored graft failure (defined by return to dialysis)                                                                               |
|                            | Competing event                                                               | 1. No<br>2. Death with functioning graft<br>3. Dialysis/re-transplantation                                                                                                                                                                                                                                                                             | 1.Dialysis/re-transplantation<br>2.Death with functioning graft                                                                                                                              | Death with functioning graft                                                                                                                                                                                                                                                                                                                                                                                                                                                                                                            | 1.Death with functioning graft<br>2 Dialysis/re-transplantation                                                                                                                                                                                                                                 | Death with functioning graft and re-transplantation                                                                                        |
|                            | Accounted for competing risk                                                  | Not clearly specified                                                                                                                                                                                                                                                                                                                                  | Not clearly specified                                                                                                                                                                        | Not clearly specified                                                                                                                                                                                                                                                                                                                                                                                                                                                                                                                   | Not clearly specified                                                                                                                                                                                                                                                                           | Not clearly specified                                                                                                                      |
| Horizon of prediction      |                                                                               | 5 years                                                                                                                                                                                                                                                                                                                                                | 2 years                                                                                                                                                                                      | 1, 2, 3, 5, 7, and 10 years                                                                                                                                                                                                                                                                                                                                                                                                                                                                                                             | 1, 3, 5, 7 years                                                                                                                                                                                                                                                                                | 8 years                                                                                                                                    |
| DEVELOPMENT COHORT         | Development cohort type                                                       | Registry: United States Renal Data System                                                                                                                                                                                                                                                                                                              | Single center Cohort                                                                                                                                                                         | Registry: USRDS                                                                                                                                                                                                                                                                                                                                                                                                                                                                                                                         | Registry: United States Renal Data System                                                                                                                                                                                                                                                       | Single center Cohort (Necker Hospital)                                                                                                     |
|                            | Years of transplantation                                                      | 2000 - 2006                                                                                                                                                                                                                                                                                                                                            | 1999 - 2002                                                                                                                                                                                  | 1990 - 1999                                                                                                                                                                                                                                                                                                                                                                                                                                                                                                                             | 1995 - 2002                                                                                                                                                                                                                                                                                     | 2004 - 2010                                                                                                                                |
|                            | Sample size                                                                   | 59091 for model at transplantation<br>57603 for model at 7 days<br>43743 for model at 1 year                                                                                                                                                                                                                                                           | 392                                                                                                                                                                                          | 92844                                                                                                                                                                                                                                                                                                                                                                                                                                                                                                                                   | 5389                                                                                                                                                                                                                                                                                            | 939                                                                                                                                        |
|                            | Statistical model used                                                        | Cox regression model                                                                                                                                                                                                                                                                                                                                   | Logistic regression model                                                                                                                                                                    | Tree based model analysis                                                                                                                                                                                                                                                                                                                                                                                                                                                                                                               | Logistic regression model<br>Cox regression model<br>Artificial Neural Networks (ANNs)                                                                                                                                                                                                          | Cox regression model                                                                                                                       |
|                            | Predictors measured at transplantation                                        | Model at transplantation: donor age, recipient race, first versus subsequent transplant, prior years on renal replacement therapy, recipient age, primary cause of CKD, hepatitis C virus antibody status, donor history of hypertension, recipient primary insurance coverage, donor cause of death, and total HLA antigen mismatches.                | Recipient age, living donor , peripheral vascular dis, oral anticoagulation, smoking, haemodialysis, serum calcium, serum albumin                                                            | Recipient variable: recipient race, gender, age, height, weight, recipient having a transplant before the current one, total number of transplants, the time waiting list, predominant RRT, percent time on Peritoneal Dialysis, number of RRT used, specific combination of RRT, recipient comorbidity score, cardiovascular disease, unstable angina, diabetes, hypertension, presence of hepatitis B core antibodies, hepatitis C antibodies, peak and most recent level of panel reactive antibodies, and pay for medical services. | Recipient variables: age; gender; race; height; weight; cause of ESRD; history of hypertension, diabetes, or cardiovascular disease; duration between date of current transplantation and failure date of the previous transplantation, dialysis modality, primary source of pay for treatment. | 1.Model with Antibody-mediated rejection (ABMR) Molecular Score : donor age, the humoral histologic score, and the ABMR molecular score    |
|                            | Predictors used in the final model                                            | Model at 7 days: eGFR at hospital discharge, donor age, primary cause of CKD, recipient race, recipient age, and years on renal replacement therapy.<br>Model at 1 year: eGFR at 1 year post-transplant, recipient race, hospitalization during year 1 post-transplant, primary cause of CKD, recipient age, and recipient primary insurance coverage. |                                                                                                                                                                                              | Donor variables: donor race, gender, age, height, weight, donor type.<br>Transplant procedure variables: cold ischemia time and number of matched HLA antigens, using MMF in the immunosuppressive regimen                                                                                                                                                                                                                                                                                                                              | Donor variables: donor type, age, gender, race, height, weight, cause of death.<br>Transplantation parameters: number of matched HLA antigens, cold storage time, procedure type.                                                                                                               | 2.Model with endothelial DSA-selective transcripts: donor age, the humoral histologic score, and the endothelial DSA-selective transcripts |
|                            | Predictors measured after transplantation                                     | Characteristics available at 7 days then at 1 years                                                                                                                                                                                                                                                                                                    |                                                                                                                                                                                              |                                                                                                                                                                                                                                                                                                                                                                                                                                                                                                                                         |                                                                                                                                                                                                                                                                                                 | eGFR at time of rejection , Antibody-mediated rejection (ABMR) within first years after transplantation                                    |
|                            | Method used to account for post-transplant predictors                         | Only patients alive with transplant function at 7 days, then at 12 months were selected to develop the model                                                                                                                                                                                                                                           |                                                                                                                                                                                              |                                                                                                                                                                                                                                                                                                                                                                                                                                                                                                                                         |                                                                                                                                                                                                                                                                                                 | Not clearly specified                                                                                                                      |
|                            | Prediction tools presentation form                                            | Original model                                                                                                                                                                                                                                                                                                                                         | Score                                                                                                                                                                                        | Original model                                                                                                                                                                                                                                                                                                                                                                                                                                                                                                                          | Original model                                                                                                                                                                                                                                                                                  | Original model                                                                                                                             |
|                            | Proposed thresholds for clinical use / Proposed software or online-calculator |                                                                                                                                                                                                                                                                                                                                                        | Threshold defined at quartiles points.<br>Three risk groups:<br>- Lower risk group: score between 0 – 2.5<br>- Intermediate risk group: score between 3 – 8.5<br>- High risk group: score ≥9 |                                                                                                                                                                                                                                                                                                                                                                                                                                                                                                                                         |                                                                                                                                                                                                                                                                                                 |                                                                                                                                            |
| PER FOR VALIDATION COHORT  | Internal validation                                                           | Yes                                                                                                                                                                                                                                                                                                                                                    | No                                                                                                                                                                                           | Yes                                                                                                                                                                                                                                                                                                                                                                                                                                                                                                                                     | Yes                                                                                                                                                                                                                                                                                             | Yes                                                                                                                                        |
|                            | Internal validation type                                                      | Split-sample 70%, 30%                                                                                                                                                                                                                                                                                                                                  |                                                                                                                                                                                              | Split-sample 67%, 33%                                                                                                                                                                                                                                                                                                                                                                                                                                                                                                                   | 10 fold cross-validation                                                                                                                                                                                                                                                                        | Bootstrapping                                                                                                                              |
|                            | External validation                                                           | Yes                                                                                                                                                                                                                                                                                                                                                    | Yes                                                                                                                                                                                          | No                                                                                                                                                                                                                                                                                                                                                                                                                                                                                                                                      | No                                                                                                                                                                                                                                                                                              | Yes                                                                                                                                        |
|                            | External validation type                                                      | Spatial                                                                                                                                                                                                                                                                                                                                                | Temporal                                                                                                                                                                                     |                                                                                                                                                                                                                                                                                                                                                                                                                                                                                                                                         |                                                                                                                                                                                                                                                                                                 | Spatial                                                                                                                                    |
|                            | External validation cohort (sample size)                                      |                                                                                                                                                                                                                                                                                                                                                        | Transplanted in January 2007 – December 2007 (n=157)                                                                                                                                         |                                                                                                                                                                                                                                                                                                                                                                                                                                                                                                                                         |                                                                                                                                                                                                                                                                                                 | 321 transplanted at Saint-Louis                                                                                                            |
| Overall                    |                                                                               |                                                                                                                                                                                                                                                                                                                                                        |                                                                                                                                                                                              |                                                                                                                                                                                                                                                                                                                                                                                                                                                                                                                                         |                                                                                                                                                                                                                                                                                                 |                                                                                                                                            |

|                                                  |                                                                                                                                                                  |   |                                                                                                                                                             |                                                                                                                                                                                                                                                                                                                  |                                                                  |                                                                          |
|--------------------------------------------------|------------------------------------------------------------------------------------------------------------------------------------------------------------------|---|-------------------------------------------------------------------------------------------------------------------------------------------------------------|------------------------------------------------------------------------------------------------------------------------------------------------------------------------------------------------------------------------------------------------------------------------------------------------------------------|------------------------------------------------------------------|--------------------------------------------------------------------------|
| Discrimination                                   | AUC for graft failure by internal validation:<br>- 0.649 for model at transplantation<br>- 0.674 for model at 7 days<br>- 0.716 for model at 1 years             |   | AUC<br>- 0.63 at 1 year<br>- 0.64 at 2 years<br>0.71 at 3 years<br>0.82 at 5 years<br>0.90 at 10 years                                                      | AUC (for 1, 2, 3, 5, 7 years):<br>1. Death-censored graft failure<br>Logistic: 0.71 - 0.72 - 0.75 - 0.81<br>Cox: 0.72 - 0.73 - 0.74 - 0.80<br>ANNs: 0.61 - 0.68 - 0.73 - 0.82<br>2.Death (any cause)<br>Logistic: 0.71 - 0.73 - 0.77 - 0.81<br>Cox: 0.72 - 0.73 - 0.76 - 0.80<br>ANNs: 0.59 - 0.66 - 0.75 - 0.82 |                                                                  | AUC for model with ABMR Molecular Score:<br>0.81 for internal validation |
|                                                  | AUC for graft failure by external validation:<br>- 0.61-0.70 for model at transplantation<br>- 0.60-0.72 for model at 7 days<br>- 0.64-0.78 for model at 1 years |   |                                                                                                                                                             |                                                                                                                                                                                                                                                                                                                  |                                                                  |                                                                          |
|                                                  |                                                                                                                                                                  |   |                                                                                                                                                             |                                                                                                                                                                                                                                                                                                                  |                                                                  |                                                                          |
|                                                  |                                                                                                                                                                  |   |                                                                                                                                                             |                                                                                                                                                                                                                                                                                                                  |                                                                  |                                                                          |
| Calibration                                      | Slope of prognostic index for graft failure<br>- 1.04 for model at transplantation<br>- 0.99 for model at 7 days<br>- 0.96 for model at 1 year                   |   | Agreement between predicted and observed graft survival (correlation r2=0.94, r2=0.98, r2=0.99, r2=0.93, and r2=0.98) for 1,2,3,5 and 10 years respectively |                                                                                                                                                                                                                                                                                                                  | Hosmer-Lemeshow for all analysis was Chisq > 10 (P>0.05)         |                                                                          |
| Reclassification                                 |                                                                                                                                                                  |   |                                                                                                                                                             |                                                                                                                                                                                                                                                                                                                  | For the model with ABMR Molecular Score:<br>NRI= 1.01, IDI= 0.16 |                                                                          |
| Other performance indicator                      |                                                                                                                                                                  |   |                                                                                                                                                             |                                                                                                                                                                                                                                                                                                                  |                                                                  |                                                                          |
| Other studies used for comparison                |                                                                                                                                                                  |   |                                                                                                                                                             |                                                                                                                                                                                                                                                                                                                  |                                                                  |                                                                          |
| Number of citation in google scholar at 31/04/16 | 21                                                                                                                                                               | 0 | 17                                                                                                                                                          | 24                                                                                                                                                                                                                                                                                                               | 29                                                               |                                                                          |



| Author and years<br>(journal) |                                                                               | Lowsky et al. 2012 (47)<br>(Statistics in Medicine)                                                                                                                                                                                            | MacHnicki et al. 2009 (48)<br>(American Journal of Transplantation)                                                                                                                                                                                                               | Moore et al. 2011 (44)<br>(American Journal of Kidney Diseases)                                                                                                                                                                                                                                                                                | Moore et al. 2011(61)<br>(Experimental and Clinical Transplantation)                                                                                                                                                                                                                                                                                                                                                                                                                                                 | Munivenkatappa et al. 2008 (49)<br>(American Journal of Transplantation)                                                                                                                                                       |
|-------------------------------|-------------------------------------------------------------------------------|------------------------------------------------------------------------------------------------------------------------------------------------------------------------------------------------------------------------------------------------|-----------------------------------------------------------------------------------------------------------------------------------------------------------------------------------------------------------------------------------------------------------------------------------|------------------------------------------------------------------------------------------------------------------------------------------------------------------------------------------------------------------------------------------------------------------------------------------------------------------------------------------------|----------------------------------------------------------------------------------------------------------------------------------------------------------------------------------------------------------------------------------------------------------------------------------------------------------------------------------------------------------------------------------------------------------------------------------------------------------------------------------------------------------------------|--------------------------------------------------------------------------------------------------------------------------------------------------------------------------------------------------------------------------------|
| Type of study                 |                                                                               | Development and validation of a new model                                                                                                                                                                                                      | Development and validation of a new model                                                                                                                                                                                                                                         | Development and validation of a new model                                                                                                                                                                                                                                                                                                      | Validation with model updating                                                                                                                                                                                                                                                                                                                                                                                                                                                                                       | Development and validation of a new model                                                                                                                                                                                      |
| Donor type                    |                                                                               | Living and deceased donor                                                                                                                                                                                                                      | Deceased donor                                                                                                                                                                                                                                                                    | Living and deceased donor                                                                                                                                                                                                                                                                                                                      | Living and deceased donor                                                                                                                                                                                                                                                                                                                                                                                                                                                                                            | Deceased donor                                                                                                                                                                                                                 |
| Recipient age range           |                                                                               | Unspecified                                                                                                                                                                                                                                    | ≥18 years                                                                                                                                                                                                                                                                         | ≥ 18 years                                                                                                                                                                                                                                                                                                                                     | ≥ 16 years                                                                                                                                                                                                                                                                                                                                                                                                                                                                                                           | Adult (Age range unspecified)                                                                                                                                                                                                  |
| OUTCOMES                      | Studied event                                                                 | Graft failure (dialysis/re-transplantation/death)                                                                                                                                                                                              | 1.Graft failure (dialysis/re-transplantation/death)<br>2.Death with functional graft<br>3.Death (including death after return to dialysis)                                                                                                                                        | 1.Graft failure (dialysis/re-transplantation/death)<br>2.Death censored graft failure                                                                                                                                                                                                                                                          | Death with functional graft                                                                                                                                                                                                                                                                                                                                                                                                                                                                                          | Death censored graft failure (return to dialysis, or a decline in renal function to a glomerular filtration rate (GFR), of <20 mL/min)                                                                                         |
|                               | Competing event                                                               | No                                                                                                                                                                                                                                             | 1.No<br>2. Dialysis/re-transplantation<br>3. Dialysis/re-transplantation                                                                                                                                                                                                          | 1.No<br>2.Death with functioning graft                                                                                                                                                                                                                                                                                                         | Dialysis/re-transplantation                                                                                                                                                                                                                                                                                                                                                                                                                                                                                          | Death with functioning graft and re-transplantation                                                                                                                                                                            |
|                               | Accounted for competing risk                                                  |                                                                                                                                                                                                                                                | Not clearly specified                                                                                                                                                                                                                                                             | Not clearly specified                                                                                                                                                                                                                                                                                                                          | Not clearly specified                                                                                                                                                                                                                                                                                                                                                                                                                                                                                                | Not clearly specified                                                                                                                                                                                                          |
|                               | Horizon of prediction                                                         | 5 years                                                                                                                                                                                                                                        | 9 years                                                                                                                                                                                                                                                                           | 7 years                                                                                                                                                                                                                                                                                                                                        | 3 and 5 years                                                                                                                                                                                                                                                                                                                                                                                                                                                                                                        | 5 years                                                                                                                                                                                                                        |
| DEVELOPMENT COHORT            | Development cohort type                                                       | Registry: United States Renal Data System                                                                                                                                                                                                      | Registry: United States Renal Data System                                                                                                                                                                                                                                         | Multi-centers LOTESS (novates multicentre study)                                                                                                                                                                                                                                                                                               | LOTESS database (novates multicentre study)                                                                                                                                                                                                                                                                                                                                                                                                                                                                          | Single center (Maryland Medical Center)                                                                                                                                                                                        |
|                               | Years of transplantation                                                      | 1996-1999                                                                                                                                                                                                                                      | 1995 - 2002                                                                                                                                                                                                                                                                       | 1995 - 1998                                                                                                                                                                                                                                                                                                                                    | 1995 - 1998                                                                                                                                                                                                                                                                                                                                                                                                                                                                                                          | 1999 - 2005                                                                                                                                                                                                                    |
|                               | Sample size                                                                   | 30051                                                                                                                                                                                                                                          | 25270                                                                                                                                                                                                                                                                             | 2763                                                                                                                                                                                                                                                                                                                                           | 2033                                                                                                                                                                                                                                                                                                                                                                                                                                                                                                                 | 371                                                                                                                                                                                                                            |
|                               | Statistical model used                                                        | Mahalanobis K-nearest neighbor (MKNN)<br>Random survival forests (RSF)<br>Cox regression model                                                                                                                                                 | Cox regression model                                                                                                                                                                                                                                                              | Cox regression model                                                                                                                                                                                                                                                                                                                           | Cox regression model                                                                                                                                                                                                                                                                                                                                                                                                                                                                                                 | Cox regression model                                                                                                                                                                                                           |
|                               | Predictors measured at transplantation                                        | Age, pre-event dialysis time , Blood type, Peak panel-reactive antibody, Body mass index, Cause of end-stage renal disease, Pre-transplant blood transfusion, Previous transplant, Donor type, Expanded criteria donor, and Year of transplant | Model 1— Organ Procurement Transplant Network (OPTN) variables (OPTN only)<br>Model 2— Clinical Classifications Software (CCS) disease categories + OPTN variables (OPTN+CCS)<br>Model 3—Charlson comorbidities plus OPTN variables<br>Model 4—Elixhauser comorbidities plus OPTN | For death censored graft failure: age, Race, eGFR<br><br>For graft failure: recipient age, Sex, eGFR                                                                                                                                                                                                                                           | Model 1: Recipient Risk Score (RRS, Baskin-Bey et al. 2007 (25)<br>Model 2: Age-adjusted Charlson Comorbidity Index<br>Model 3: Foley Score<br>Model 4: Wright-Khan Index<br>Model 5: Charlson Comorbidity Index<br>Model 6: Modified End-Stage Renal Diseases Charlson Comorbidity Index<br>Model 7: Davies Index<br>Models 2-7 included:<br>- Donor: age, sex, race, and source.<br>- Recipient: age, sex, race, duration of dialysis, dialysis modality, prior transplant, induction, use of, and body mass index | Arteriolar hyalinosis, periglomerular fibrosis, presence of scar , glomerulosclerosis, wall-to-lumen ratio                                                                                                                     |
|                               | Predictors used in the final model                                            |                                                                                                                                                                                                                                                | All models were adjusted for donor, recipient and transplant characteristics                                                                                                                                                                                                      |                                                                                                                                                                                                                                                                                                                                                |                                                                                                                                                                                                                                                                                                                                                                                                                                                                                                                      |                                                                                                                                                                                                                                |
|                               | Predictors measured after transplantation                                     |                                                                                                                                                                                                                                                |                                                                                                                                                                                                                                                                                   | Data were collected prospectively in a cohort: eGFR at data collection, serum urea nitrogen, serum albumin at 6 month before data collection, percentages decrease in eGFR during preceding 6 months before data collection and acute rejection<br>Only patients alive with transplant function at 12 months was selected to develop the model |                                                                                                                                                                                                                                                                                                                                                                                                                                                                                                                      |                                                                                                                                                                                                                                |
|                               | Method used to account for post-transplant predictors                         |                                                                                                                                                                                                                                                |                                                                                                                                                                                                                                                                                   |                                                                                                                                                                                                                                                                                                                                                |                                                                                                                                                                                                                                                                                                                                                                                                                                                                                                                      |                                                                                                                                                                                                                                |
|                               | Prediction tools presentation form                                            | Original model                                                                                                                                                                                                                                 | Original model                                                                                                                                                                                                                                                                    | Score                                                                                                                                                                                                                                                                                                                                          | Existing model (Model 1 - RRS)<br>Updated model (Models 2-7)                                                                                                                                                                                                                                                                                                                                                                                                                                                         | Score: Maryland Aggregate Pathology Index (MAPI)                                                                                                                                                                               |
|                               | Proposed thresholds for clinical use / Proposed software or online-calculator |                                                                                                                                                                                                                                                |                                                                                                                                                                                                                                                                                   | No threshold, but proposed a simple score derivation (range 0 to 181 for death censored and 0 to 179 for graft failure)                                                                                                                                                                                                                        |                                                                                                                                                                                                                                                                                                                                                                                                                                                                                                                      | Threshold defined after sensibility/specificity analysis. Three groups (score range: 0-15):<br>- Lower risk group: MAPI from 0 to 7<br>- Intermediate risk group: MAPI from 8 to 11<br>- Higher risk group: MAPI from 12 to 15 |
| VALIDATION COHORT             | Internal validation                                                           | Yes                                                                                                                                                                                                                                            | Yes                                                                                                                                                                                                                                                                               | Yes                                                                                                                                                                                                                                                                                                                                            | Yes                                                                                                                                                                                                                                                                                                                                                                                                                                                                                                                  | Yes                                                                                                                                                                                                                            |
|                               | Internal validation type                                                      | Split sample 80% -20% (7512)                                                                                                                                                                                                                   | Cross-validation<br>Bootstrapping                                                                                                                                                                                                                                                 | Random split 70% - 30%                                                                                                                                                                                                                                                                                                                         | Unspecified                                                                                                                                                                                                                                                                                                                                                                                                                                                                                                          | Split sample 67%-33%                                                                                                                                                                                                           |
|                               | External validation                                                           | Yes                                                                                                                                                                                                                                            | No                                                                                                                                                                                                                                                                                | Yes                                                                                                                                                                                                                                                                                                                                            | Yes                                                                                                                                                                                                                                                                                                                                                                                                                                                                                                                  | No                                                                                                                                                                                                                             |
|                               | External validation type                                                      | Temporal                                                                                                                                                                                                                                       |                                                                                                                                                                                                                                                                                   | Spatial                                                                                                                                                                                                                                                                                                                                        | Fully                                                                                                                                                                                                                                                                                                                                                                                                                                                                                                                |                                                                                                                                                                                                                                |
|                               | External validation cohort (sample size)                                      | 13525 transplanted at 1999                                                                                                                                                                                                                     |                                                                                                                                                                                                                                                                                   | Transplanted in Elisabeth hospital, Birmingham in 1996 – 2006 (n=731)                                                                                                                                                                                                                                                                          |                                                                                                                                                                                                                                                                                                                                                                                                                                                                                                                      |                                                                                                                                                                                                                                |
| PERFORMANCES                  | Overall                                                                       |                                                                                                                                                                                                                                                | AUC                                                                                                                                                                                                                                                                               | AUC                                                                                                                                                                                                                                                                                                                                            | AUC                                                                                                                                                                                                                                                                                                                                                                                                                                                                                                                  |                                                                                                                                                                                                                                |
|                               | Discrimination                                                                |                                                                                                                                                                                                                                                | Models Graft loss DWF Death                                                                                                                                                                                                                                                       | Internal 0.73 for graft failure<br>0.87 for death censored graft failure                                                                                                                                                                                                                                                                       | Models For model original Include age for updated model                                                                                                                                                                                                                                                                                                                                                                                                                                                              | AUC 0.70 for development cohort<br>0.74 for validation cohort                                                                                                                                                                  |



| Author and years (journal) |                                                                                                                                                                                                                      | Rao et al 2009 (45)<br>(Transplantation)                                                                                                                                                                                                                                                  | Schnitzler et al. 2012(50)<br>(Transplantation)                                                                                                                                                                                                                                                                                                                                                                                                                                                                                                                                | Schold et al. 2005 (51)<br>(American Journal of Transplantation)                                                                                                                                                                                          | Shabir et al. 2014 (53)<br>(American Journal of Kidney Diseases)                                                                                                               | Szabo et al. 2011(58)<br>(Journal of Nephrology)                                                                                                                                                                             |
|----------------------------|----------------------------------------------------------------------------------------------------------------------------------------------------------------------------------------------------------------------|-------------------------------------------------------------------------------------------------------------------------------------------------------------------------------------------------------------------------------------------------------------------------------------------|--------------------------------------------------------------------------------------------------------------------------------------------------------------------------------------------------------------------------------------------------------------------------------------------------------------------------------------------------------------------------------------------------------------------------------------------------------------------------------------------------------------------------------------------------------------------------------|-----------------------------------------------------------------------------------------------------------------------------------------------------------------------------------------------------------------------------------------------------------|--------------------------------------------------------------------------------------------------------------------------------------------------------------------------------|------------------------------------------------------------------------------------------------------------------------------------------------------------------------------------------------------------------------------|
| Type of study              |                                                                                                                                                                                                                      | Development and validation of a new model                                                                                                                                                                                                                                                 | Development and validation of a new model                                                                                                                                                                                                                                                                                                                                                                                                                                                                                                                                      | Development and validation of a new model                                                                                                                                                                                                                 | Development and validation of a new model                                                                                                                                      | Validation without any model updating                                                                                                                                                                                        |
| Donor type                 |                                                                                                                                                                                                                      | Deceased donor                                                                                                                                                                                                                                                                            | Living and deceased donor                                                                                                                                                                                                                                                                                                                                                                                                                                                                                                                                                      | Deceased donors                                                                                                                                                                                                                                           | Living and deceased donor                                                                                                                                                      | Deceased donor                                                                                                                                                                                                               |
| Recipient age range        |                                                                                                                                                                                                                      | ≥ 18 years                                                                                                                                                                                                                                                                                | Unspecified                                                                                                                                                                                                                                                                                                                                                                                                                                                                                                                                                                    | Adult (Age range unspecified)                                                                                                                                                                                                                             | ≥ 18 years                                                                                                                                                                     | ≥ 18 years                                                                                                                                                                                                                   |
| OUTCOMES                   | Studied event                                                                                                                                                                                                        | Graft failure (dialysis/re-transplantation/death)                                                                                                                                                                                                                                         | Graft failure (dialysis/re-transplantation/death)                                                                                                                                                                                                                                                                                                                                                                                                                                                                                                                              | 1.Graft failure (dialysis/re-transplantation/death)<br>2.Death censored graft failure                                                                                                                                                                     | 1.Death censored graft failure<br>2.Graft failure (dialysis/re-transplantation/death)                                                                                          | Death (unspecified)                                                                                                                                                                                                          |
|                            | Competing event                                                                                                                                                                                                      | No                                                                                                                                                                                                                                                                                        | No                                                                                                                                                                                                                                                                                                                                                                                                                                                                                                                                                                             | 1.No<br>2.Death with functioning graft                                                                                                                                                                                                                    | 1.Death with functioning graft<br>2.No                                                                                                                                         | Dialysis/re-transplantation                                                                                                                                                                                                  |
|                            | Accounted for competing risk                                                                                                                                                                                         |                                                                                                                                                                                                                                                                                           |                                                                                                                                                                                                                                                                                                                                                                                                                                                                                                                                                                                | Not clearly specified                                                                                                                                                                                                                                     | Not clearly specified                                                                                                                                                          | Not clearly specified                                                                                                                                                                                                        |
| Time horizon of prediction |                                                                                                                                                                                                                      | Long-term (unspecified)                                                                                                                                                                                                                                                                   | to 9 years                                                                                                                                                                                                                                                                                                                                                                                                                                                                                                                                                                     | 1 and 5 years                                                                                                                                                                                                                                             | 5 years                                                                                                                                                                        | 5 years                                                                                                                                                                                                                      |
| DEVELOPMENT COHORT         | Development cohort type                                                                                                                                                                                              | Registry: SRTR/OPTN                                                                                                                                                                                                                                                                       | Registry: United States Renal Data System                                                                                                                                                                                                                                                                                                                                                                                                                                                                                                                                      | Registry: Scientific Registry of Transplant Recipients                                                                                                                                                                                                    | Multi-center cohort                                                                                                                                                            | Single center                                                                                                                                                                                                                |
|                            | Years of Transplantation                                                                                                                                                                                             | 1995 - 2005                                                                                                                                                                                                                                                                               | 1995 - 2004                                                                                                                                                                                                                                                                                                                                                                                                                                                                                                                                                                    | 1996-2002                                                                                                                                                                                                                                                 | 1999 - 2006                                                                                                                                                                    | 1991 - 2004                                                                                                                                                                                                                  |
|                            | Sample size                                                                                                                                                                                                          | 69440                                                                                                                                                                                                                                                                                     | 87575                                                                                                                                                                                                                                                                                                                                                                                                                                                                                                                                                                          | 45850                                                                                                                                                                                                                                                     | 651                                                                                                                                                                            |                                                                                                                                                                                                                              |
|                            | Statistical model used                                                                                                                                                                                               | Cox regression model                                                                                                                                                                                                                                                                      | Cox regression model                                                                                                                                                                                                                                                                                                                                                                                                                                                                                                                                                           | Cox regression model                                                                                                                                                                                                                                      | Cox regression model                                                                                                                                                           | Cox regression model                                                                                                                                                                                                         |
|                            | Predictors measured at transplantation                                                                                                                                                                               | Donor age, race, history of hypertension, history of diabetes, serum creatinine, cerebrovascular cause of death, height, weight, donation after cardiac death, hepatitis C virus status, human leukocyte antigen-B and DR mismatch, cold ischemia time, and double or in bloc transplant. | 1. Standard criteria donor (SCD): Recipient variables (age, sex, pre-transplant dialysis, body mass index, Cause of ESRD glomerulonephritis, diabetes, previous transplant, peak panel-reactive antibody, HLA mismatches, race, year of transplant). Donor variable (hypertension, cytomegalovirus serology, race, cause of death),<br>2. Expanded criteria donor (ECD): Recipient variables (age, sex, Body mass index, cause of ESRD glomerulonephritis, diabetes, previous transplant, peak panel-reactive Antibody, HLA mismatches, race, year of transplant), donor race, | Donor/Recipient CMV match, donor race, donor age, cause of Death, HLA, cold ischemia time, donor history of hypertension, donor history of diabetes                                                                                                       | Sex, Race                                                                                                                                                                      | Age, pre-transplant cardiovascular disease, serum creatinine at discharge, left ventricular hypertrophy, vascular calcification, diabetes before renal transplantation, time on dialysis > 48 months, acute tubular necrosis |
|                            | Predictors used in the final model                                                                                                                                                                                   |                                                                                                                                                                                                                                                                                           |                                                                                                                                                                                                                                                                                                                                                                                                                                                                                                                                                                                |                                                                                                                                                                                                                                                           |                                                                                                                                                                                |                                                                                                                                                                                                                              |
|                            | Predictors measured after transplantation                                                                                                                                                                            |                                                                                                                                                                                                                                                                                           | eGFR at 1 years, acute rejection within 1 year                                                                                                                                                                                                                                                                                                                                                                                                                                                                                                                                 |                                                                                                                                                                                                                                                           | Recipient age, acute rejection, transplant function (eGFR), serum albumin level and urine albumin-creatinine ratio at 6 month and 12 month                                     |                                                                                                                                                                                                                              |
|                            | Method used to account for post-transplant predictors                                                                                                                                                                |                                                                                                                                                                                                                                                                                           | Only patients alive with transplant function at 12 months was selected to develop the model                                                                                                                                                                                                                                                                                                                                                                                                                                                                                    |                                                                                                                                                                                                                                                           | Only patients alive with transplant function at 12 months was selected to develop the model                                                                                    |                                                                                                                                                                                                                              |
|                            | Prediction tools presentation form                                                                                                                                                                                   | Score (KDRI)                                                                                                                                                                                                                                                                              | Original model                                                                                                                                                                                                                                                                                                                                                                                                                                                                                                                                                                 | Score                                                                                                                                                                                                                                                     | Original model                                                                                                                                                                 | Existing score developed on Spanish population (Hernandez et al, 2005)                                                                                                                                                       |
|                            | Proposed thresholds for clinical use / Proposed software or online-calculator                                                                                                                                        | Threshold defined at quintiles points.<br>Five risk groups:<br>- Group1: KDRI from 0.45 to 0.79<br>- Group2: KDRI from 0.79 to 0.96<br>- Group3: KDRI from 0.96 to 1.15<br>- Group4: KDRI from 1.15 to 1.45<br>- Group5: KDRI > 1.45                                                      |                                                                                                                                                                                                                                                                                                                                                                                                                                                                                                                                                                                | Threshold defined by cluster analysis.<br>Five risk classes:<br>- Class I : score from 0 to 0.234<br>- Class II : score from 0.234 to 0.524<br>- Class III : score from 0.524 to 0.853<br>- Class IV : score from 0.853 to1.17<br>- Class V : score >1.17 |                                                                                                                                                                                |                                                                                                                                                                                                                              |
| VALIDATION COHORT          | Remapping of the KDRI (KDPI):<br><a href="https://optn.transplant.hrsa.gov/resources/allocation-calculators/kdpi-calculator/">https://optn.transplant.hrsa.gov/resources/allocation-calculators/kdpi-calculator/</a> |                                                                                                                                                                                                                                                                                           |                                                                                                                                                                                                                                                                                                                                                                                                                                                                                                                                                                                |                                                                                                                                                                                                                                                           |                                                                                                                                                                                |                                                                                                                                                                                                                              |
|                            | Internal validation                                                                                                                                                                                                  | Yes                                                                                                                                                                                                                                                                                       | Yes                                                                                                                                                                                                                                                                                                                                                                                                                                                                                                                                                                            | Yes                                                                                                                                                                                                                                                       | No                                                                                                                                                                             | No                                                                                                                                                                                                                           |
|                            | Internal validation type                                                                                                                                                                                             | 5 fold cross-validation (one half)                                                                                                                                                                                                                                                        | Unspecified                                                                                                                                                                                                                                                                                                                                                                                                                                                                                                                                                                    | Split random 67% - 33%                                                                                                                                                                                                                                    |                                                                                                                                                                                |                                                                                                                                                                                                                              |
|                            | External validation                                                                                                                                                                                                  | No                                                                                                                                                                                                                                                                                        | Yes                                                                                                                                                                                                                                                                                                                                                                                                                                                                                                                                                                            | Yes                                                                                                                                                                                                                                                       | Yes                                                                                                                                                                            | Yes                                                                                                                                                                                                                          |
|                            | External validation type                                                                                                                                                                                             |                                                                                                                                                                                                                                                                                           | Spatial                                                                                                                                                                                                                                                                                                                                                                                                                                                                                                                                                                        | Spatial                                                                                                                                                                                                                                                   | Spatial                                                                                                                                                                        | Fully                                                                                                                                                                                                                        |
| PERFORMANCES               | External validation cohort (sample size)                                                                                                                                                                             |                                                                                                                                                                                                                                                                                           | From clinical trial: BENEFIT (n=345) and BENEFIT-EXT (n=244)                                                                                                                                                                                                                                                                                                                                                                                                                                                                                                                   | Naïve cohort (unspecified) (n=2230)                                                                                                                                                                                                                       | Tours in France (n=736), Leeds in UK (n=787) and Halifax in Canada (n=475)                                                                                                     | 339 transplanted in Hungaria                                                                                                                                                                                                 |
|                            | Overall                                                                                                                                                                                                              |                                                                                                                                                                                                                                                                                           |                                                                                                                                                                                                                                                                                                                                                                                                                                                                                                                                                                                | Coefficient of determination (R2)=96.0%                                                                                                                                                                                                                   |                                                                                                                                                                                |                                                                                                                                                                                                                              |
|                            | Discrimination                                                                                                                                                                                                       | AUC<br>0.62                                                                                                                                                                                                                                                                               |                                                                                                                                                                                                                                                                                                                                                                                                                                                                                                                                                                                |                                                                                                                                                                                                                                                           | AUC<br>1.For death censored graft failure:<br>Tours: 0.89; Leeds: 0.78; Halifax: 0.90<br>2.for graft failure<br>Tours: 0.80; Leeds: 0.76; Halifax: 0.81                        | AUC 0.65<br>Sensitivity / specificity (%)<br>Cut-off<br>84 27 0.12<br>56 66 0.25<br>40 82 0.46<br>24 90 0.70<br>9 98 0.93                                                                                                    |
|                            | Calibration                                                                                                                                                                                                          |                                                                                                                                                                                                                                                                                           | Internal cohort: Agreement between predicted and observed graft survival at 5 years. (r2 =99.9%) by plot<br>External validation: Agreement between predicted and observed graft survival at each years                                                                                                                                                                                                                                                                                                                                                                         | Agreement between each score level and observed graft survival (survival plot by score class)                                                                                                                                                             | Hosmer-Lemeshow test (p-value)<br>1. for death-censored graft failure<br>Tours: 0.4; Leeds: 0.1; Halifax: 0.3<br>2. for graft failure<br>Tour: 0.09; Leeds: 0.03; Halifax: 0.6 | Hosmer-Lemeshow test (p-value<0.001)                                                                                                                                                                                         |



| Author and years (journal)                       |                                                                               | Tang et al. 2011 (63)<br>(American Society for Artificial Internal Organ Journal)                                                                                                                                                                                                                                                                                                                                                                                                                                                                                                                                                                                                                                                                                                                                                                                                                                                                                |      |      |      |      |                            | Tang et al. 2011 (55)<br>(American Society for Artificial Internal Organ Journal)                                                                                                                                                                                                                                                                                                                                                                                                                                                                                                                                                                                                                             |                        |      |                                                                            | Tiong et al. 2009 (28)<br>(Journal of Urology)                                                                                                                                                                                                                      |     |     |                  | Watson et al. 2012 (52)<br>(Transplantation)                                                                                                                                                                                                                      |     |  |  |
|--------------------------------------------------|-------------------------------------------------------------------------------|------------------------------------------------------------------------------------------------------------------------------------------------------------------------------------------------------------------------------------------------------------------------------------------------------------------------------------------------------------------------------------------------------------------------------------------------------------------------------------------------------------------------------------------------------------------------------------------------------------------------------------------------------------------------------------------------------------------------------------------------------------------------------------------------------------------------------------------------------------------------------------------------------------------------------------------------------------------|------|------|------|------|----------------------------|---------------------------------------------------------------------------------------------------------------------------------------------------------------------------------------------------------------------------------------------------------------------------------------------------------------------------------------------------------------------------------------------------------------------------------------------------------------------------------------------------------------------------------------------------------------------------------------------------------------------------------------------------------------------------------------------------------------|------------------------|------|----------------------------------------------------------------------------|---------------------------------------------------------------------------------------------------------------------------------------------------------------------------------------------------------------------------------------------------------------------|-----|-----|------------------|-------------------------------------------------------------------------------------------------------------------------------------------------------------------------------------------------------------------------------------------------------------------|-----|--|--|
| Type of study                                    |                                                                               | Development and validation of a new model                                                                                                                                                                                                                                                                                                                                                                                                                                                                                                                                                                                                                                                                                                                                                                                                                                                                                                                        |      |      |      |      |                            | Development and validation of a new model                                                                                                                                                                                                                                                                                                                                                                                                                                                                                                                                                                                                                                                                     |                        |      |                                                                            | Development and validation of a new model                                                                                                                                                                                                                           |     |     |                  | Development and validation of a new model                                                                                                                                                                                                                         |     |  |  |
| Donor type                                       |                                                                               | Living donor                                                                                                                                                                                                                                                                                                                                                                                                                                                                                                                                                                                                                                                                                                                                                                                                                                                                                                                                                     |      |      |      |      |                            | Donor type unspecified                                                                                                                                                                                                                                                                                                                                                                                                                                                                                                                                                                                                                                                                                        |                        |      |                                                                            | Living donor                                                                                                                                                                                                                                                        |     |     |                  | Deceased donor                                                                                                                                                                                                                                                    |     |  |  |
| Recipient age range                              |                                                                               | Adult (Age range unspecified)                                                                                                                                                                                                                                                                                                                                                                                                                                                                                                                                                                                                                                                                                                                                                                                                                                                                                                                                    |      |      |      |      |                            | ≥ 18 years                                                                                                                                                                                                                                                                                                                                                                                                                                                                                                                                                                                                                                                                                                    |                        |      |                                                                            | Adult (Age range unspecified)                                                                                                                                                                                                                                       |     |     |                  | ≥ 18 years                                                                                                                                                                                                                                                        |     |  |  |
| OUTCOMES                                         | Studied event                                                                 | Death censored graft failure                                                                                                                                                                                                                                                                                                                                                                                                                                                                                                                                                                                                                                                                                                                                                                                                                                                                                                                                     |      |      |      |      |                            | Graft failure (dialysis/re-transplantation/death)                                                                                                                                                                                                                                                                                                                                                                                                                                                                                                                                                                                                                                                             |                        |      |                                                                            | Graft failure (Dialysis/death/re-transplantation)                                                                                                                                                                                                                   |     |     |                  | Graft failure (dialysis/re-transplantation/death)                                                                                                                                                                                                                 |     |  |  |
|                                                  | Competing event                                                               | Death with functioning graft                                                                                                                                                                                                                                                                                                                                                                                                                                                                                                                                                                                                                                                                                                                                                                                                                                                                                                                                     |      |      |      |      |                            | No                                                                                                                                                                                                                                                                                                                                                                                                                                                                                                                                                                                                                                                                                                            |                        |      |                                                                            | No                                                                                                                                                                                                                                                                  |     |     |                  | No                                                                                                                                                                                                                                                                |     |  |  |
|                                                  | Accounted for competing risk                                                  | Not clearly specified                                                                                                                                                                                                                                                                                                                                                                                                                                                                                                                                                                                                                                                                                                                                                                                                                                                                                                                                            |      |      |      |      |                            |                                                                                                                                                                                                                                                                                                                                                                                                                                                                                                                                                                                                                                                                                                               |                        |      |                                                                            |                                                                                                                                                                                                                                                                     |     |     |                  |                                                                                                                                                                                                                                                                   |     |  |  |
| Time horizon of prediction                       |                                                                               | 1,3, 5,7,10 years                                                                                                                                                                                                                                                                                                                                                                                                                                                                                                                                                                                                                                                                                                                                                                                                                                                                                                                                                |      |      |      |      |                            | 3                                                                                                                                                                                                                                                                                                                                                                                                                                                                                                                                                                                                                                                                                                             |                        |      |                                                                            | 5                                                                                                                                                                                                                                                                   |     |     |                  | 0- 9 years (overall) and 90 days, 3 month to 3 years, over 3 years                                                                                                                                                                                                |     |  |  |
| DEVELOPMENT COHORT                               | Development cohort type                                                       | Registry: United States Renal Data System                                                                                                                                                                                                                                                                                                                                                                                                                                                                                                                                                                                                                                                                                                                                                                                                                                                                                                                        |      |      |      |      |                            | Registry: United States Renal Data System                                                                                                                                                                                                                                                                                                                                                                                                                                                                                                                                                                                                                                                                     |                        |      |                                                                            | Registry: United Network for Organ Sharing                                                                                                                                                                                                                          |     |     |                  | Registry: UK Transplant Registry                                                                                                                                                                                                                                  |     |  |  |
|                                                  | Years of transplantation                                                      | 1990 - 2004                                                                                                                                                                                                                                                                                                                                                                                                                                                                                                                                                                                                                                                                                                                                                                                                                                                                                                                                                      |      |      |      |      |                            | 1985 - 2002                                                                                                                                                                                                                                                                                                                                                                                                                                                                                                                                                                                                                                                                                                   |                        |      |                                                                            | 2000 - 2003                                                                                                                                                                                                                                                         |     |     |                  | 2000 - 2007                                                                                                                                                                                                                                                       |     |  |  |
|                                                  | Sample size                                                                   | 92844 for 1 year<br>73672 for 3 year<br>58005 for 5 year                                                                                                                                                                                                                                                                                                                                                                                                                                                                                                                                                                                                                                                                                                                                                                                                                                                                                                         |      |      |      |      |                            | 46791 for 7 years<br>35279 for 10 years<br>4754                                                                                                                                                                                                                                                                                                                                                                                                                                                                                                                                                                                                                                                               |                        |      |                                                                            | 20085                                                                                                                                                                                                                                                               |     |     |                  | 4570                                                                                                                                                                                                                                                              |     |  |  |
|                                                  | Statistical model used                                                        | Tree based model                                                                                                                                                                                                                                                                                                                                                                                                                                                                                                                                                                                                                                                                                                                                                                                                                                                                                                                                                 |      |      |      |      |                            | Classification trees, Logistic regression, and Artificial neural networks                                                                                                                                                                                                                                                                                                                                                                                                                                                                                                                                                                                                                                     |                        |      |                                                                            | Cox regression model                                                                                                                                                                                                                                                |     |     |                  | Cox regression model                                                                                                                                                                                                                                              |     |  |  |
|                                                  | Predictors used in the final model                                            | Predictors measured at transplantation<br>Recipient variables: age, gender, race, height, weight, history of hypertension, diabetes, unstable angina, cardiovascular or peripheral vascular diseases, peak panel reactive antibody, Recipient serum albumin , Dialysis modality predominant dialysis modality, total time on waiting list, immediately before, Transplantation, Predominate ESRD modality, Recipient dialysis modality used before transplantation for at least 60 days, primary source of payment for treatment, if recipient has US citizenship, a comorbidity score, peak PRA level, and most recent PRA level.<br>Donor variables: donor type, age, gender, race, height, and weight.<br>Transplantation parameters: the degree of human leukocyte antigen (HLA) match, donor cold storage time, history of previous transplantation, total number of transplantations, and if the recipient used mycophenolate in immunosuppressive therapy |      |      |      |      |                            | Model with 38 variables: Recipient age, Recipient race, Recipient ethnicity, Recipient height, Recipient weight, Duration of ESRD, Charlson index, Recipient history of cardiovascular diseases, Recipient history of diabetes, Recipient history of hypertension, Number of pre-transplant blood transfusion, Number of previous pregnancies, Dialysis was required during first post-transplant week, Number of matched human leukocyte antigens, Number of previous transplantations, Maintenance regimen includes, Induction regimen includes, Donor cold ischemia time, Donor age, Donor race, Donor gender, Donor height, Donor weight, Donor type, Donor cause of death, Donor history of hypertension |                        |      |                                                                            | Recipient : age, gendre, race, BMI, HLA, Donor age, donor gender, donor race, donor BMI, donor serum creatinine, nephrectomy type, cause of graft failure, depleting antibodies, IL2 receptor, azathioprine, mycophenolatemofetil, rapamycin, calcineurin inhibitor |     |     |                  | Recipient age, donor age, history of hypertension, donor weight, days in hospital, adrenaline                                                                                                                                                                     |     |  |  |
|                                                  | Predictors measured after transplantation                                     |                                                                                                                                                                                                                                                                                                                                                                                                                                                                                                                                                                                                                                                                                                                                                                                                                                                                                                                                                                  |      |      |      |      |                            |                                                                                                                                                                                                                                                                                                                                                                                                                                                                                                                                                                                                                                                                                                               |                        |      |                                                                            | Delayed graft function, any treated rejection episode in 6 months and eGFR at 6-month                                                                                                                                                                               |     |     |                  |                                                                                                                                                                                                                                                                   |     |  |  |
|                                                  | Method used to account for post-transplant predictors                         |                                                                                                                                                                                                                                                                                                                                                                                                                                                                                                                                                                                                                                                                                                                                                                                                                                                                                                                                                                  |      |      |      |      |                            |                                                                                                                                                                                                                                                                                                                                                                                                                                                                                                                                                                                                                                                                                                               |                        |      |                                                                            | Not clearly specified                                                                                                                                                                                                                                               |     |     |                  |                                                                                                                                                                                                                                                                   |     |  |  |
|                                                  | Prediction tools presentation form                                            | Original model                                                                                                                                                                                                                                                                                                                                                                                                                                                                                                                                                                                                                                                                                                                                                                                                                                                                                                                                                   |      |      |      |      |                            | Original model                                                                                                                                                                                                                                                                                                                                                                                                                                                                                                                                                                                                                                                                                                |                        |      |                                                                            | Nomogram (two proposed)                                                                                                                                                                                                                                             |     |     |                  | Score: United Kingdom Kidney Donor Risk Index (UKKDRI) for overall<br>Threshold defined at quartile points.<br>Four groups:<br>- Group 1: UKKDRI <0.87<br>- Group 2: UKKDRI from 0.88 to 1.02<br>- Group 3 : UKKDRI from 1.03 to 1.34<br>- Group 4: UKKDRI ≥ 1.35 |     |  |  |
|                                                  | Proposed thresholds for clinical use / Proposed software or online-calculator |                                                                                                                                                                                                                                                                                                                                                                                                                                                                                                                                                                                                                                                                                                                                                                                                                                                                                                                                                                  |      |      |      |      |                            |                                                                                                                                                                                                                                                                                                                                                                                                                                                                                                                                                                                                                                                                                                               |                        |      |                                                                            | No threshold but proposed a simple score derivation (range 0 to 100)                                                                                                                                                                                                |     |     |                  |                                                                                                                                                                                                                                                                   |     |  |  |
|                                                  | VALIDATION COHORT                                                             | Internal validation                                                                                                                                                                                                                                                                                                                                                                                                                                                                                                                                                                                                                                                                                                                                                                                                                                                                                                                                              | Yes  |      |      |      |                            |                                                                                                                                                                                                                                                                                                                                                                                                                                                                                                                                                                                                                                                                                                               | Yes                    |      |                                                                            |                                                                                                                                                                                                                                                                     | Yes |     |                  |                                                                                                                                                                                                                                                                   | Yes |  |  |
| Internal validation type                         |                                                                               | Split random 66% - 33%                                                                                                                                                                                                                                                                                                                                                                                                                                                                                                                                                                                                                                                                                                                                                                                                                                                                                                                                           |      |      |      |      |                            | 10 fold cross validation                                                                                                                                                                                                                                                                                                                                                                                                                                                                                                                                                                                                                                                                                      |                        |      |                                                                            | 10 fold cross-validation                                                                                                                                                                                                                                            |     |     |                  | Split-sample 60% - 40%                                                                                                                                                                                                                                            |     |  |  |
| External validation                              |                                                                               | Yes                                                                                                                                                                                                                                                                                                                                                                                                                                                                                                                                                                                                                                                                                                                                                                                                                                                                                                                                                              |      |      |      |      |                            | No                                                                                                                                                                                                                                                                                                                                                                                                                                                                                                                                                                                                                                                                                                            |                        |      |                                                                            | No                                                                                                                                                                                                                                                                  |     |     |                  | No                                                                                                                                                                                                                                                                |     |  |  |
| External validation type                         |                                                                               | Spatial                                                                                                                                                                                                                                                                                                                                                                                                                                                                                                                                                                                                                                                                                                                                                                                                                                                                                                                                                          |      |      |      |      |                            |                                                                                                                                                                                                                                                                                                                                                                                                                                                                                                                                                                                                                                                                                                               |                        |      |                                                                            |                                                                                                                                                                                                                                                                     |     |     |                  |                                                                                                                                                                                                                                                                   |     |  |  |
| External validation cohort (sample size)         |                                                                               | UUHSC (University of Utah health science center) (854)                                                                                                                                                                                                                                                                                                                                                                                                                                                                                                                                                                                                                                                                                                                                                                                                                                                                                                           |      |      |      |      |                            |                                                                                                                                                                                                                                                                                                                                                                                                                                                                                                                                                                                                                                                                                                               |                        |      |                                                                            |                                                                                                                                                                                                                                                                     |     |     |                  |                                                                                                                                                                                                                                                                   |     |  |  |
| PERFORMANCES                                     | Overall                                                                       | AUC                                                                                                                                                                                                                                                                                                                                                                                                                                                                                                                                                                                                                                                                                                                                                                                                                                                                                                                                                              |      |      |      |      |                            | AUC                                                                                                                                                                                                                                                                                                                                                                                                                                                                                                                                                                                                                                                                                                           |                        |      |                                                                            |                                                                                                                                                                                                                                                                     |     |     |                  |                                                                                                                                                                                                                                                                   |     |  |  |
|                                                  | Discrimination                                                                | years                                                                                                                                                                                                                                                                                                                                                                                                                                                                                                                                                                                                                                                                                                                                                                                                                                                                                                                                                            | 1    | 3    | 5    | 7    | 10                         | Model with 38 variables                                                                                                                                                                                                                                                                                                                                                                                                                                                                                                                                                                                                                                                                                       | Model with 6 variables | AUC  | 0.71 for pre-transplant nomogram<br>0.78 for 6 months post-transplantation |                                                                                                                                                                                                                                                                     |     | AUC | 0.62 for overall |                                                                                                                                                                                                                                                                   |     |  |  |
|                                                  |                                                                               | External validation                                                                                                                                                                                                                                                                                                                                                                                                                                                                                                                                                                                                                                                                                                                                                                                                                                                                                                                                              | 0.54 | 0.58 | 0.58 | 0.61 | 0.70                       | Logistic regression                                                                                                                                                                                                                                                                                                                                                                                                                                                                                                                                                                                                                                                                                           | 0.74                   | 0.73 |                                                                            |                                                                                                                                                                                                                                                                     |     |     |                  |                                                                                                                                                                                                                                                                   |     |  |  |
|                                                  |                                                                               |                                                                                                                                                                                                                                                                                                                                                                                                                                                                                                                                                                                                                                                                                                                                                                                                                                                                                                                                                                  |      |      |      |      | Artificial neural networks | 0.71                                                                                                                                                                                                                                                                                                                                                                                                                                                                                                                                                                                                                                                                                                          | 0.73                   |      |                                                                            |                                                                                                                                                                                                                                                                     |     |     |                  |                                                                                                                                                                                                                                                                   |     |  |  |
|                                                  | Calibration                                                                   |                                                                                                                                                                                                                                                                                                                                                                                                                                                                                                                                                                                                                                                                                                                                                                                                                                                                                                                                                                  |      |      |      |      |                            |                                                                                                                                                                                                                                                                                                                                                                                                                                                                                                                                                                                                                                                                                                               |                        |      |                                                                            | Agreement of predicted and observed graft survival (calibration plot)                                                                                                                                                                                               |     |     |                  |                                                                                                                                                                                                                                                                   |     |  |  |
|                                                  | Reclassification                                                              |                                                                                                                                                                                                                                                                                                                                                                                                                                                                                                                                                                                                                                                                                                                                                                                                                                                                                                                                                                  |      |      |      |      |                            |                                                                                                                                                                                                                                                                                                                                                                                                                                                                                                                                                                                                                                                                                                               |                        |      |                                                                            |                                                                                                                                                                                                                                                                     |     |     |                  |                                                                                                                                                                                                                                                                   |     |  |  |
| Other performance                                |                                                                               |                                                                                                                                                                                                                                                                                                                                                                                                                                                                                                                                                                                                                                                                                                                                                                                                                                                                                                                                                                  |      |      |      |      |                            |                                                                                                                                                                                                                                                                                                                                                                                                                                                                                                                                                                                                                                                                                                               |                        |      |                                                                            |                                                                                                                                                                                                                                                                     |     |     |                  |                                                                                                                                                                                                                                                                   |     |  |  |
| Other studies used for comparison                |                                                                               |                                                                                                                                                                                                                                                                                                                                                                                                                                                                                                                                                                                                                                                                                                                                                                                                                                                                                                                                                                  |      |      |      |      |                            |                                                                                                                                                                                                                                                                                                                                                                                                                                                                                                                                                                                                                                                                                                               |                        |      |                                                                            |                                                                                                                                                                                                                                                                     |     |     |                  |                                                                                                                                                                                                                                                                   |     |  |  |
| Number of citation in google scholar at 31/04/16 |                                                                               | 4                                                                                                                                                                                                                                                                                                                                                                                                                                                                                                                                                                                                                                                                                                                                                                                                                                                                                                                                                                |      |      |      |      |                            | 5                                                                                                                                                                                                                                                                                                                                                                                                                                                                                                                                                                                                                                                                                                             |                        |      |                                                                            | 25                                                                                                                                                                                                                                                                  |     |     |                  | 30                                                                                                                                                                                                                                                                |     |  |  |
